# Supplementary material for: Methylxanthines Induce a Change in the AD/Neurodegeneration-Linked Lipid Profile in Neuroblastoma Cells
Source: MDPI journal article supplement (doi:10.3390/ijms23042295), 2022-02-18
Supplement: s1 [file s1]

# Supplementary Material

## Mass spectrometry analysis of lipid changes induced by methylxanthines in different cell lines

Daniel Janitschke <sup>1,†</sup>, Anna Andrea Lauer <sup>1,†</sup>, Cornel Manuel Bachmann <sup>1</sup>, Jakob Winkler <sup>1</sup>, Lea Victoria Griebisch <sup>1</sup>, Sabrina Melanie Pilz <sup>1</sup>, Elena Leoni Theiss <sup>1</sup>, Heike Sabine Grimm <sup>1</sup>, Tobias Hartmann <sup>1,2</sup> and Marcus Otto Walter Grimm <sup>1,2,3,\*</sup>

Supplemental Figure S1

### (A) PC ae / PC aa

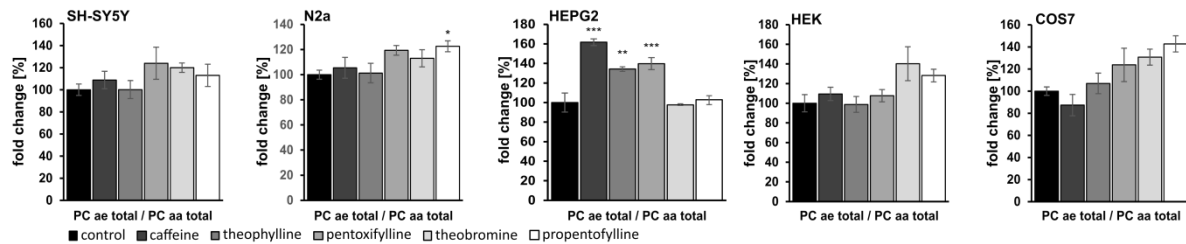

### (B) PC ae SFA / PC aa SFA

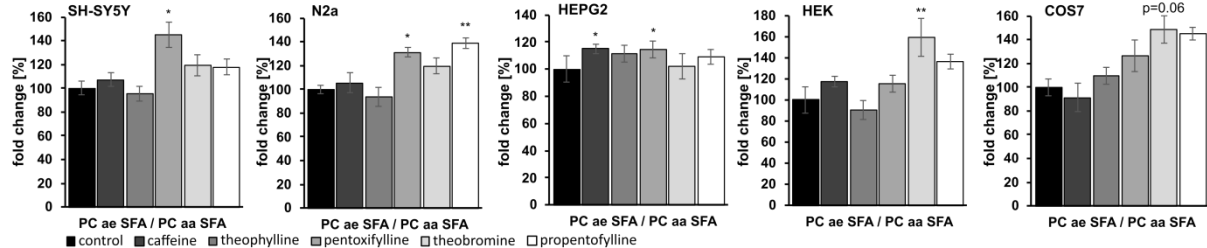

### (C) PC ae MUFA / PC aa MUFA

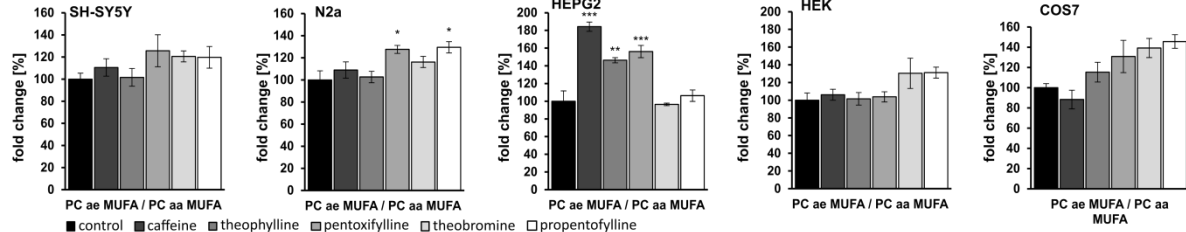

### (D) PC ae PUFA / PC aa PUFA

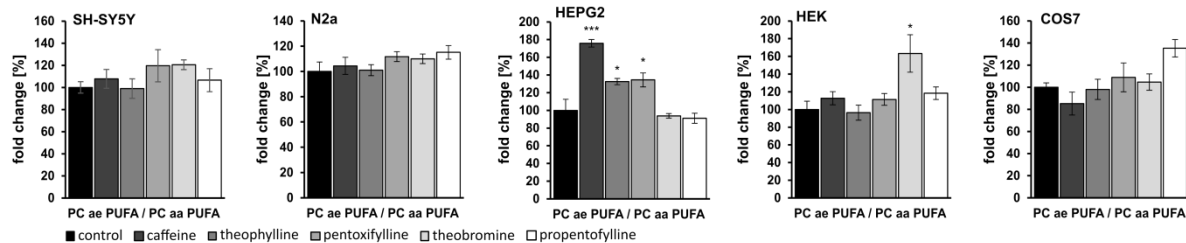

### (E) Lyso PC SFA / PC aa SFA

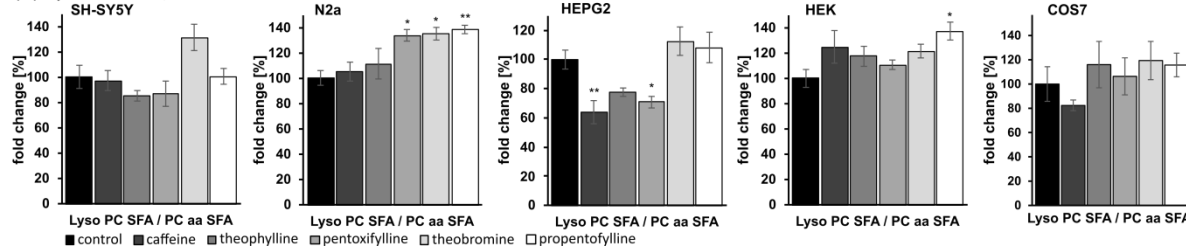

Supplemental Figure S1 (continued)

(F) SM total / PC aa total

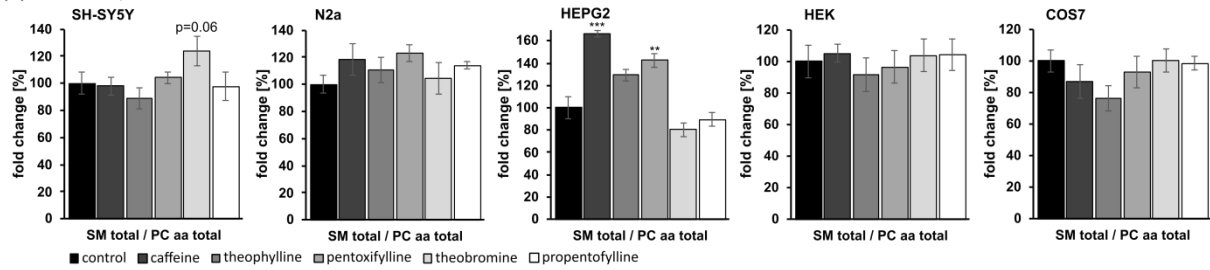

(G) SM MUFA / PC aa MUFA

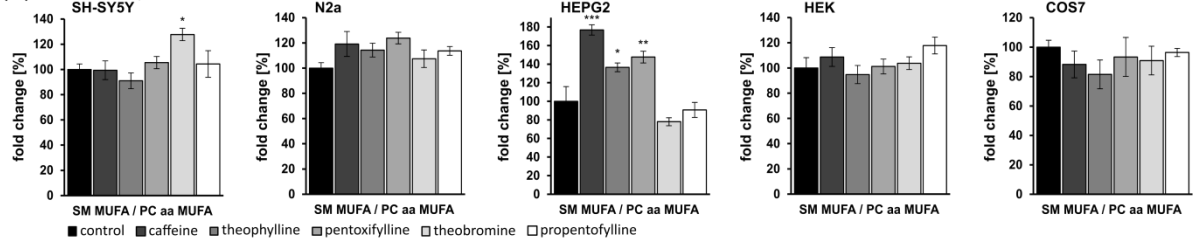

(H) SM PUFA / PC aa PUFA

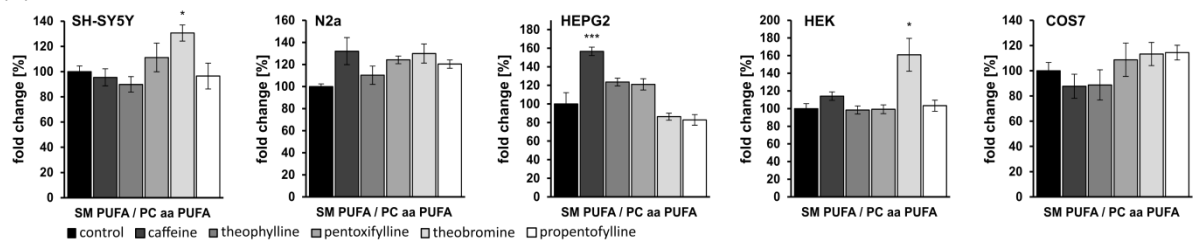

(I) Cer total / SM total

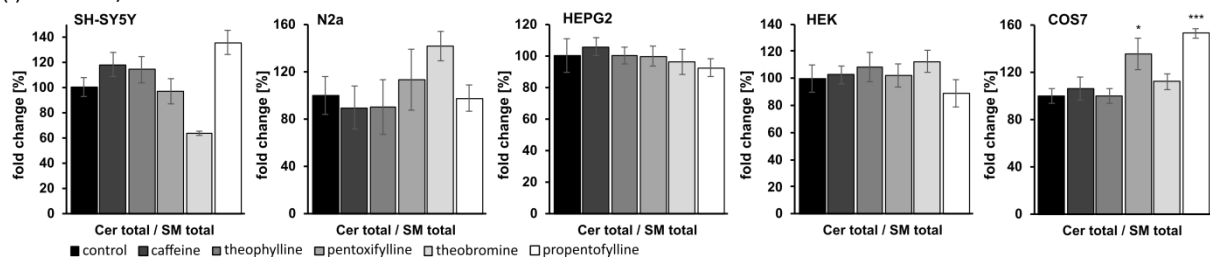

**Supplementary Figure S1:** Effect of different methylxanthines (caffeine, theophylline, pentoxifylline, theobromine, and propentofylline) on PCae / PCaa, Lyso PC/PCaa, SM/PCaa, and Cer/SM ratios in SH-SY5Y-, N2a-, HEPG2-, HEK-, and COS7 cells. Error bars represent the standard error of the mean (SEM) and statistical significance was set as \*  $p \leq 0.05$ , \*\*  $p \leq 0.01$  and \*\*\*  $p \leq 0.001$ .

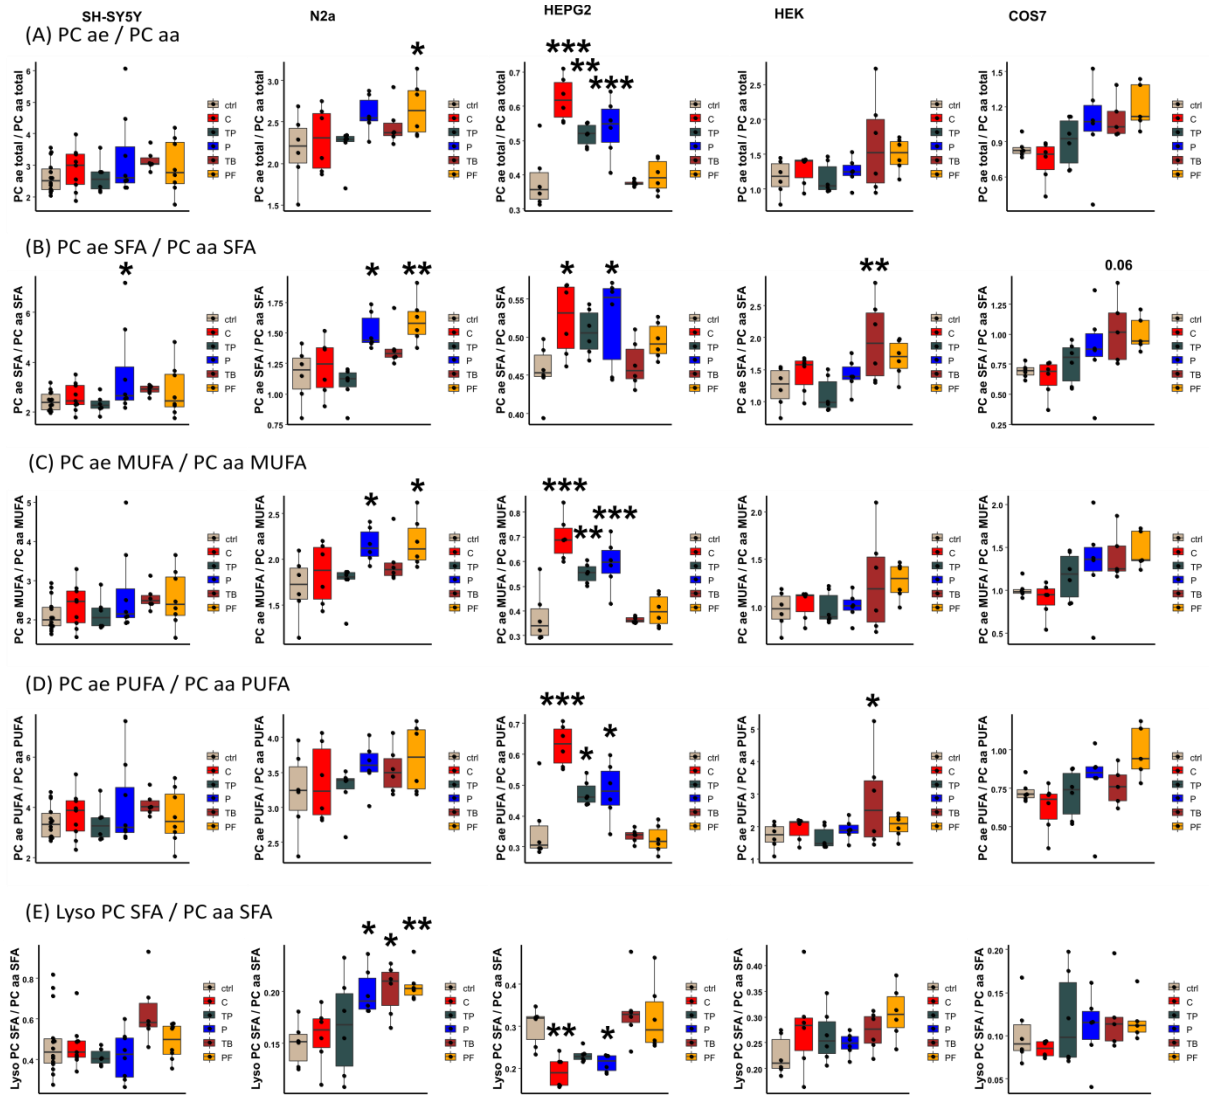

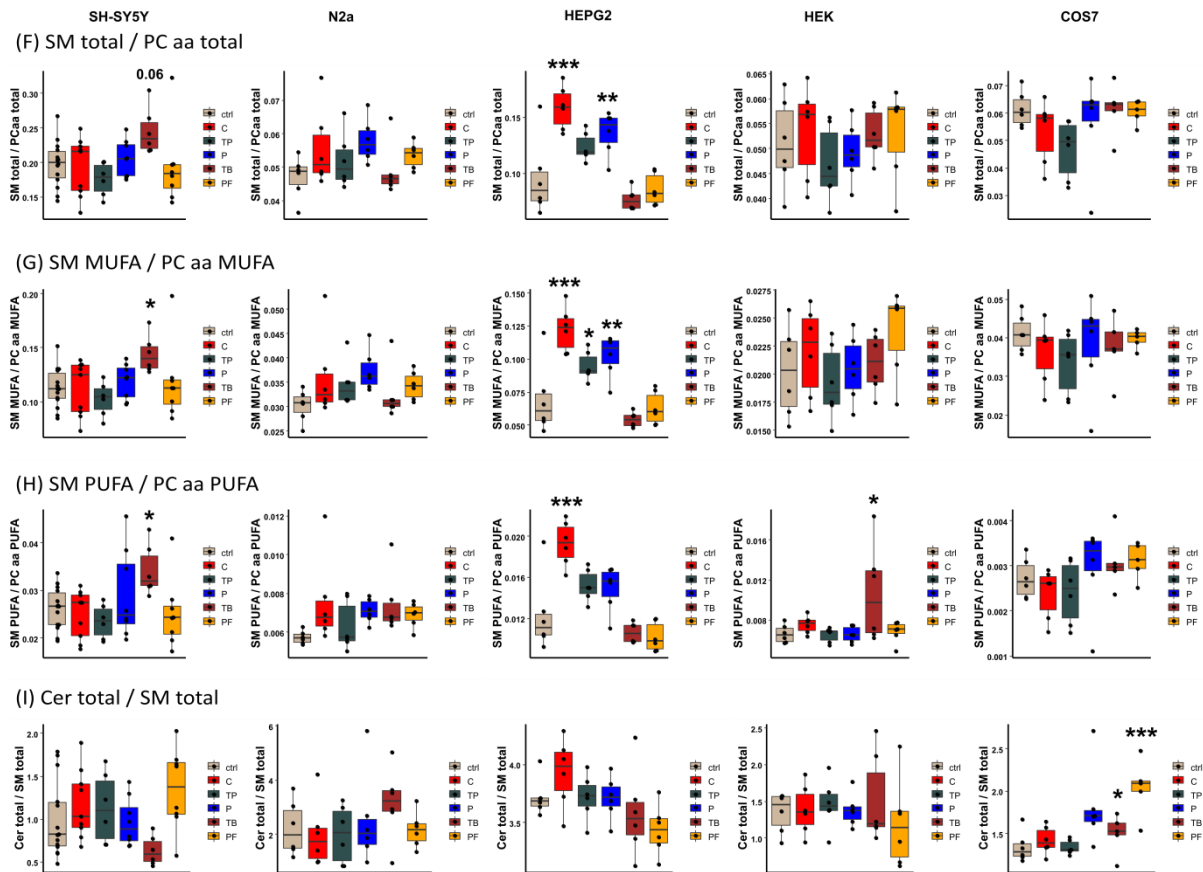

**Supplementary Figure S2:** Effect of different methylxanthines (caffeine, theophylline, pentoxifylline, theobromine, and propentofylline) on PCae / PCaa, Lyso PC/PCaa, SM/PCaa, and Cer/SM ratios in SH-SY5Y-, N2a-, HEPG2-, HEK-, and COS7 cells shown as boxplots. Error bars represent the standard error of the mean (SEM) and statistical significance was set as \*  $p \leq 0.05$ , \*\*  $p \leq 0.01$  and \*\*\*  $p \leq 0.001$ .

(A) SH-SY5Y

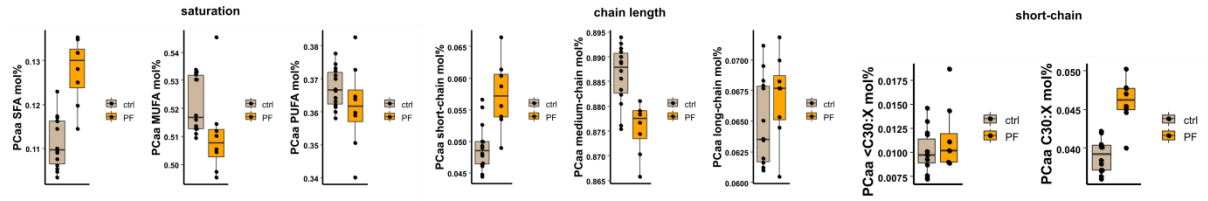

(B) N2a

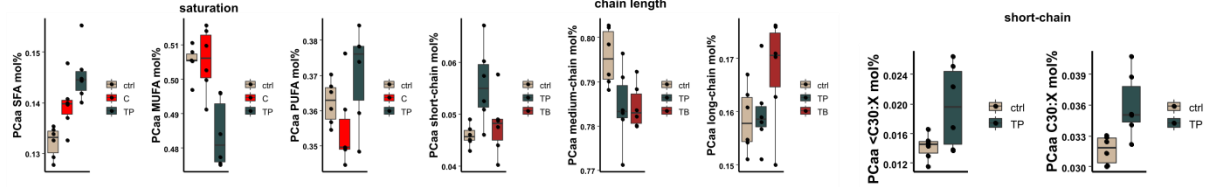

(C) HEPG2

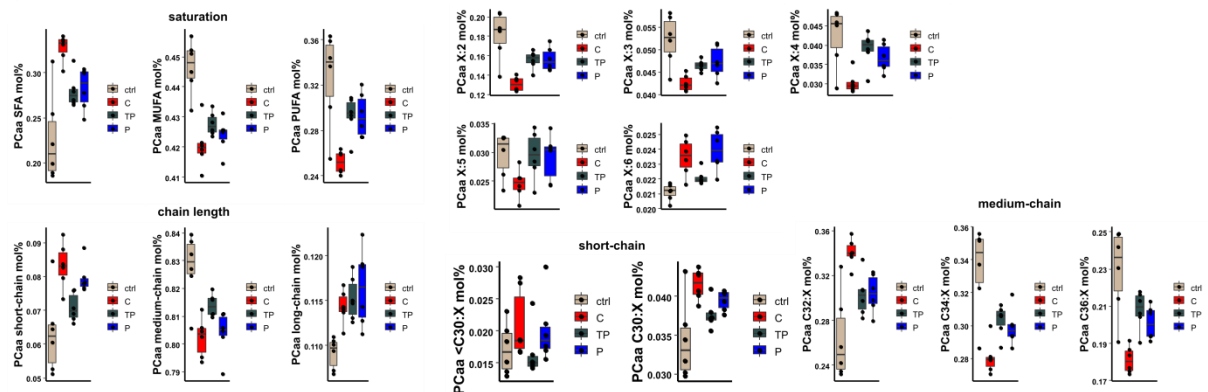

(D) HEK

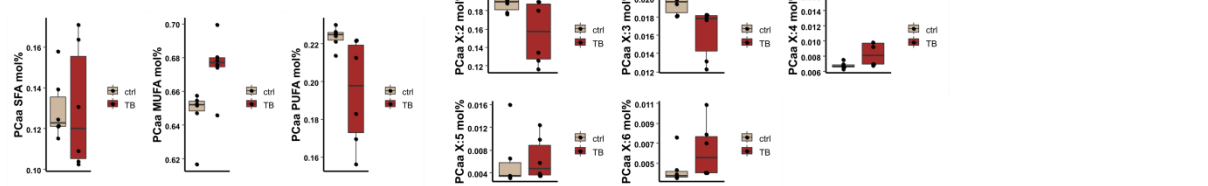

(E) COS7

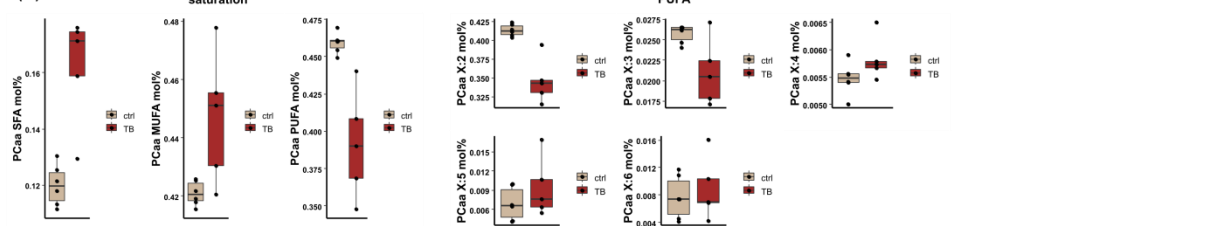

**Supplementary Figure S3:** Alterations of phosphatidylcholine (PCaa) levels in different cell lines (SH-SY5Y, N2a, HepG2, HEK and COS7) in presence of the analyzed MTXs caffeine (C), theophylline (TP), pentoxifylline (P), theobromine (TB) and propentofylline (PPF) shown as boxplots (in accordance to Figure 2).

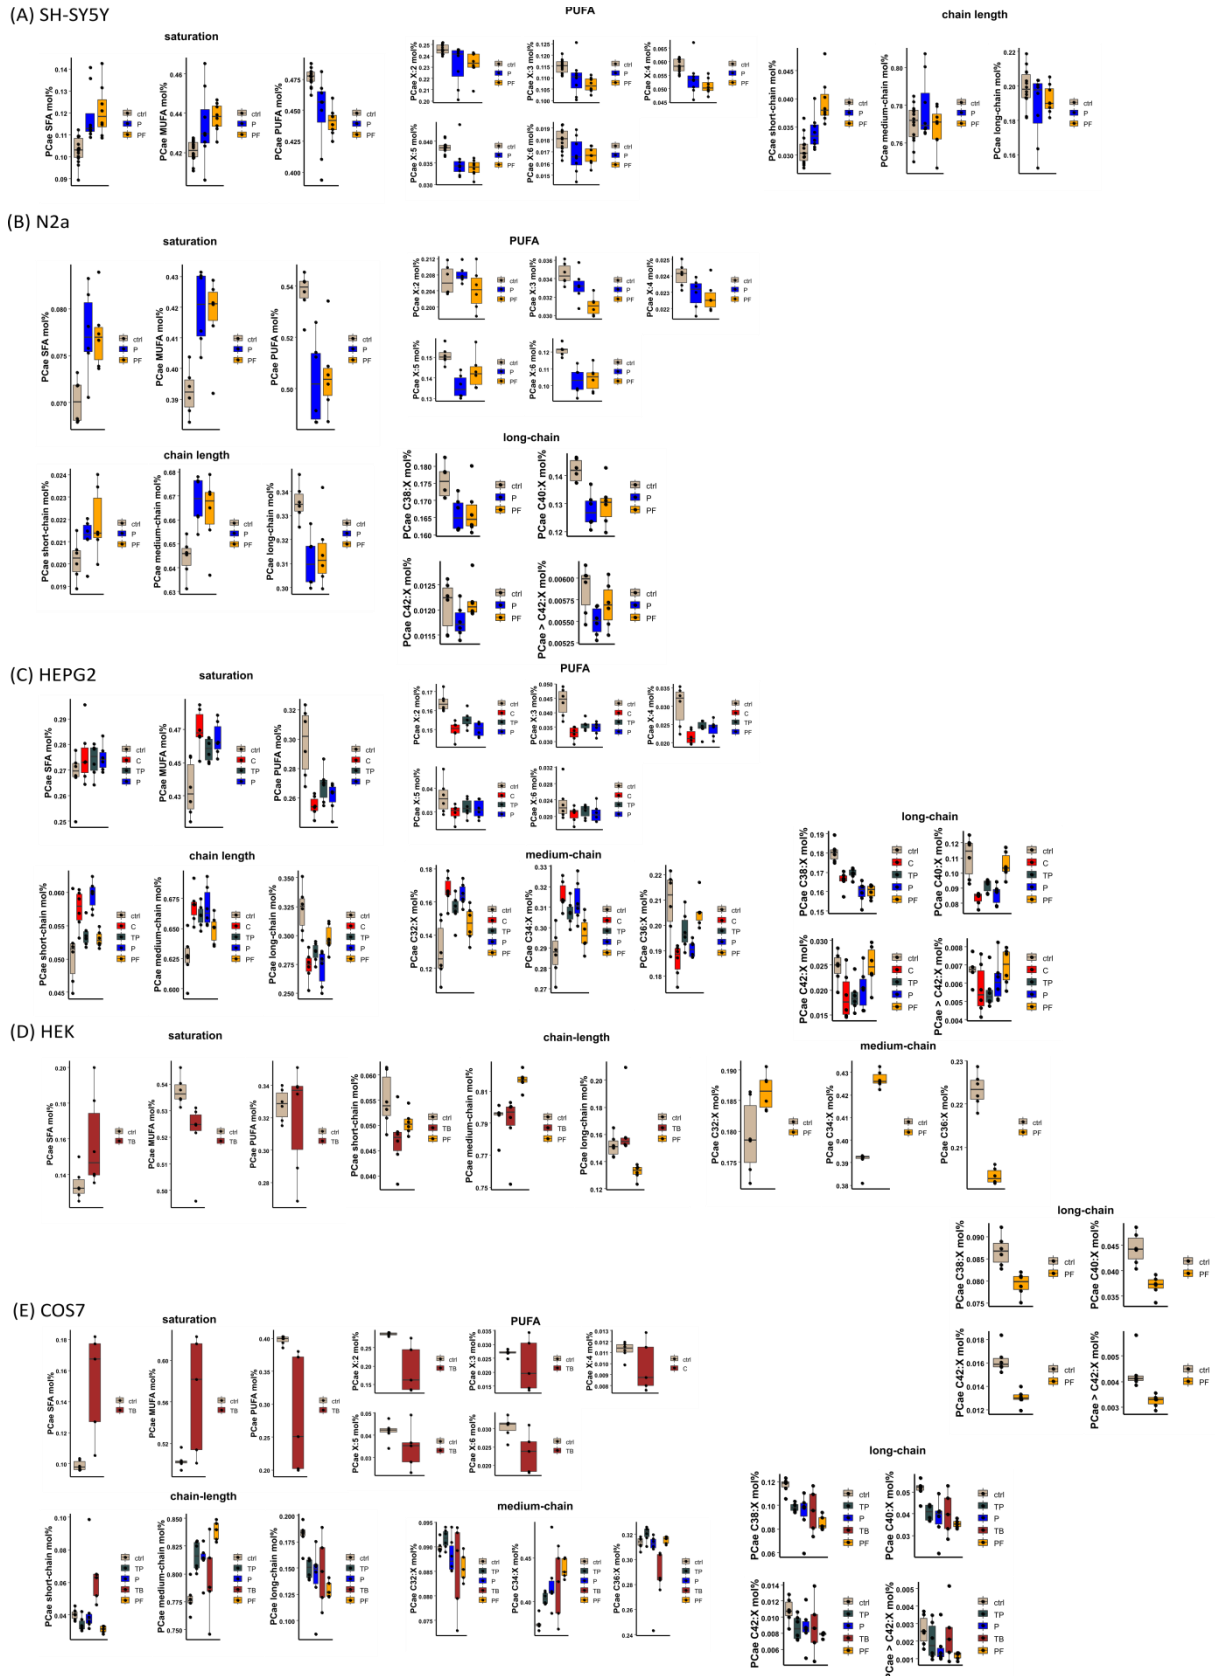

**Supplementary Figure S4:** Alterations of phosphatidylcholine plasmalogens (PCae) levels in different cell lines (SH-SY5Y, N2a, HepG2, HEK and COS7) in presence of the analyzed MTXs caffeine (C), theophylline (TP), pentoxifylline (P), theobromine (TB) and propentofylline (PPF) shown as boxplots (in accordance to Figure 3).

(A) SH-SY5Y

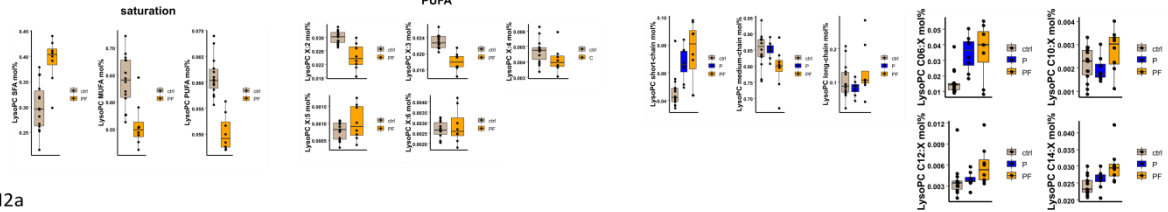

(B) N2a

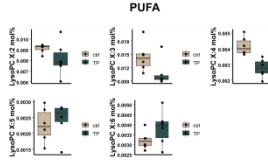

(C) HEPG2

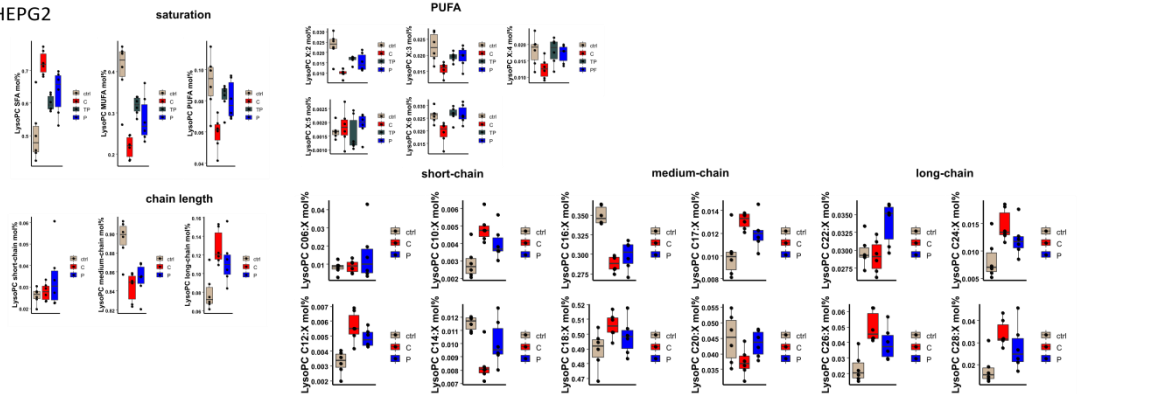

(D) COS7

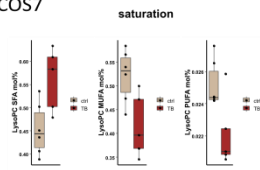

**Supplementary Figure S5:** Alterations of lyso-phosphatidylcholine (lyso-PC) levels in different cell lines (SH-SY5Y, N2a, HepG2, HEK and COS7) in presence of the analyzed MTXs caffeine (C), theophylline (TP), pentoxifylline (P), theobromine (TB) and propentofylline (PPF) shown as boxplots (in accordance to Figure 4).

(A) SH-SY5Y

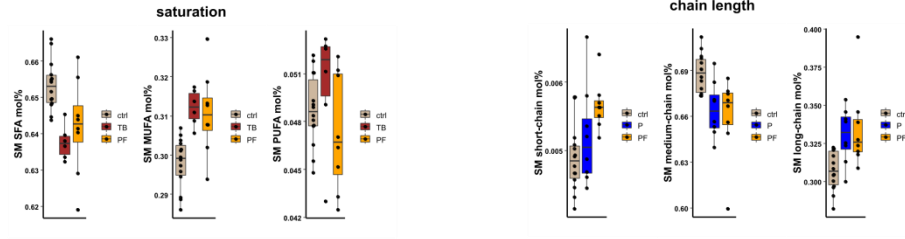

(B) N2a

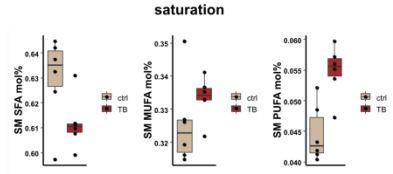

(C) HEPG2

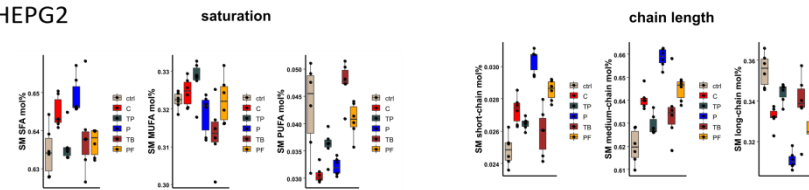

(D) HEK

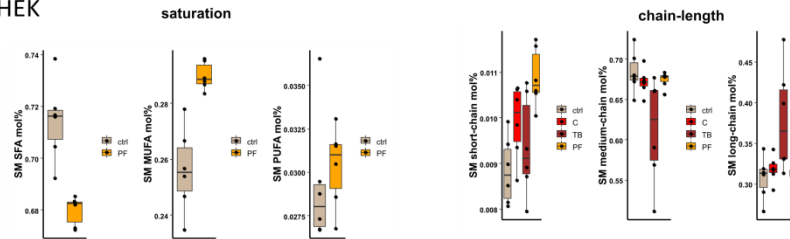

(E) COS7

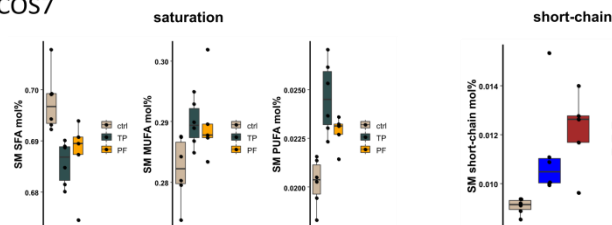

**Supplementary Figure S6:** Alterations of sphingomyelin (SM) levels in different cell lines (SH-SY5Y, N2a, HepG2, HEK and COS7) in presence of the analyzed MTXs caffeine (C), theophylline (TP), pentoxifylline (P), theobromine (TB) and propentofylline (PPF) shown as boxplots (in accordance to Figure 5).



(A) SH-SY5Y

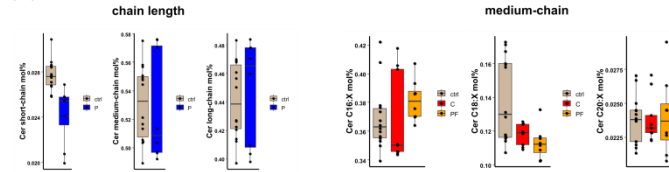

(B) N2a

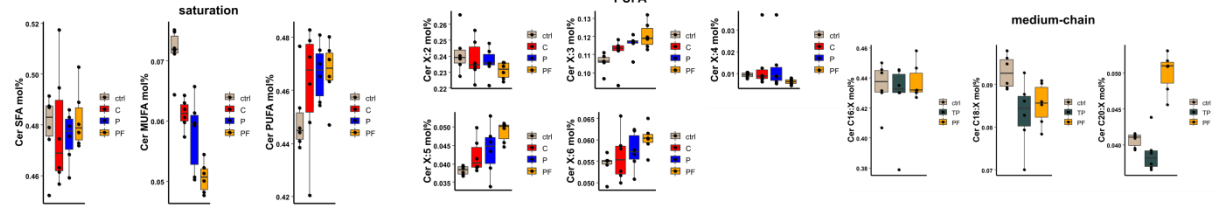

(C) HEPG2

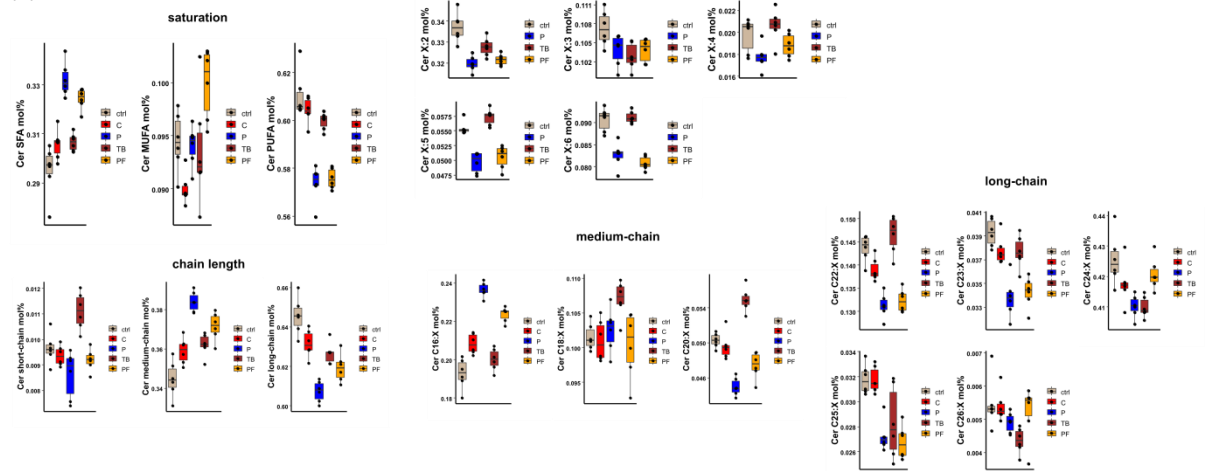

(D) HEK

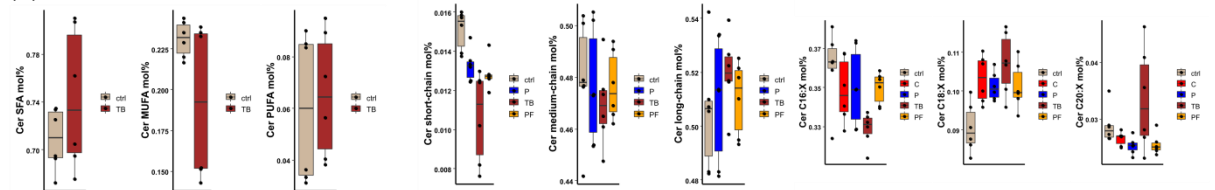

(E) COS7

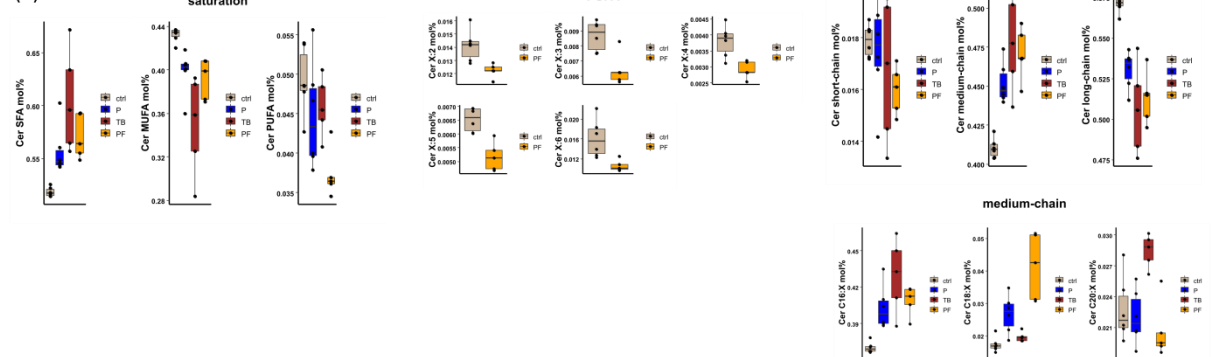

**Supplementary Figure S7:** Alterations of ceramide (Cer) levels in different cell lines (SH-SY5Y, N2a, HepG2, HEK and COS7) in presence of the analyzed MTXs caffeine (C), theophylline (TP), pentoxifylline (P), theobromine (TB) and propentofylline (PPF) shown as boxplots (in accordance to Figure 6).

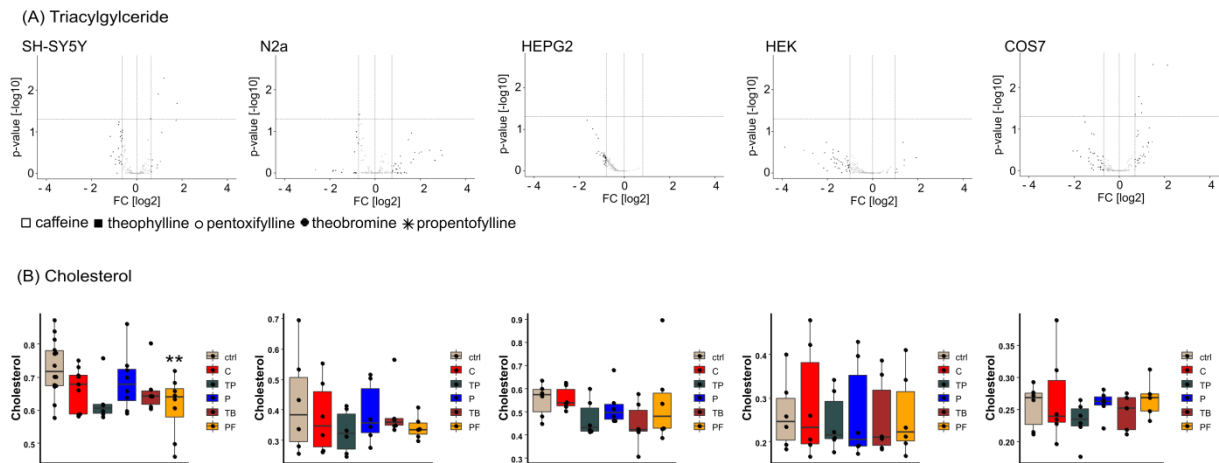

**Supplementary Figure S8:** Effect of different methylxanthines (caffeine, theophylline, pentoxifylline, theobromine, and propentofylline) on TAG and cholesterol levels in SH-SY5Y-, N2a-, HEPG2-, HEK-, and COS7 cells shown as volcano plots and boxplots. Error bars represent the standard error of the mean (SEM) and statistical significance was set as \*  $p \leq 0.05$ , \*\*  $p \leq 0.01$  and \*\*\*  $p \leq 0.001$ .

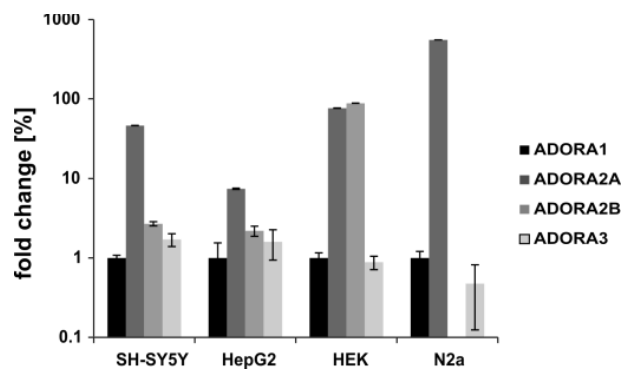

**Supplementary Figure S9:** Gene expression pattern of ADORA1, ADORA2A, ADORA2B and ADORA3 in SH-SY5Y, HepG2, HEK and N2a cells analyzed by qPCR measurement. Error bars represent the standard error of the mean (SEM).

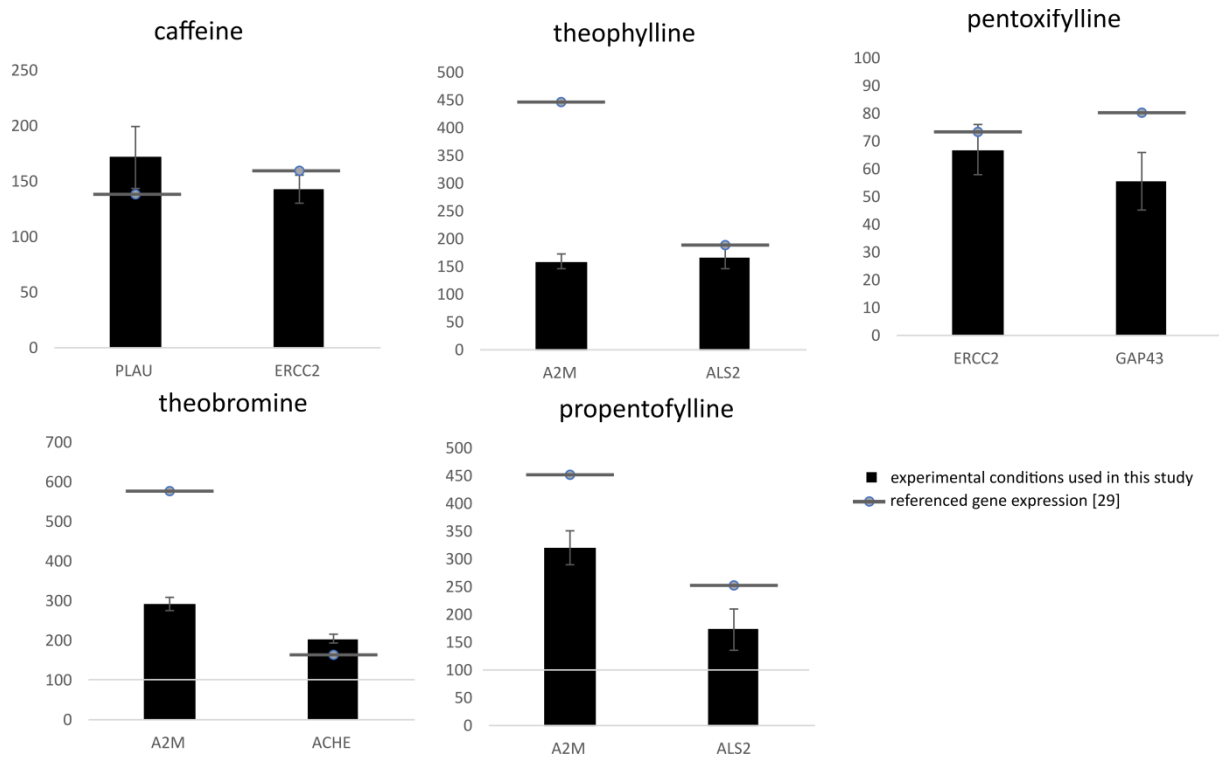

**Supplementary Figure S10:** Verification of the biological effects of the methylxanthines on known alterations in gene expressions (as reported in [29]) compared to the effects on gene expression under the experimental conditions used in this study. Error bars represent the standard error of the mean (SEM).

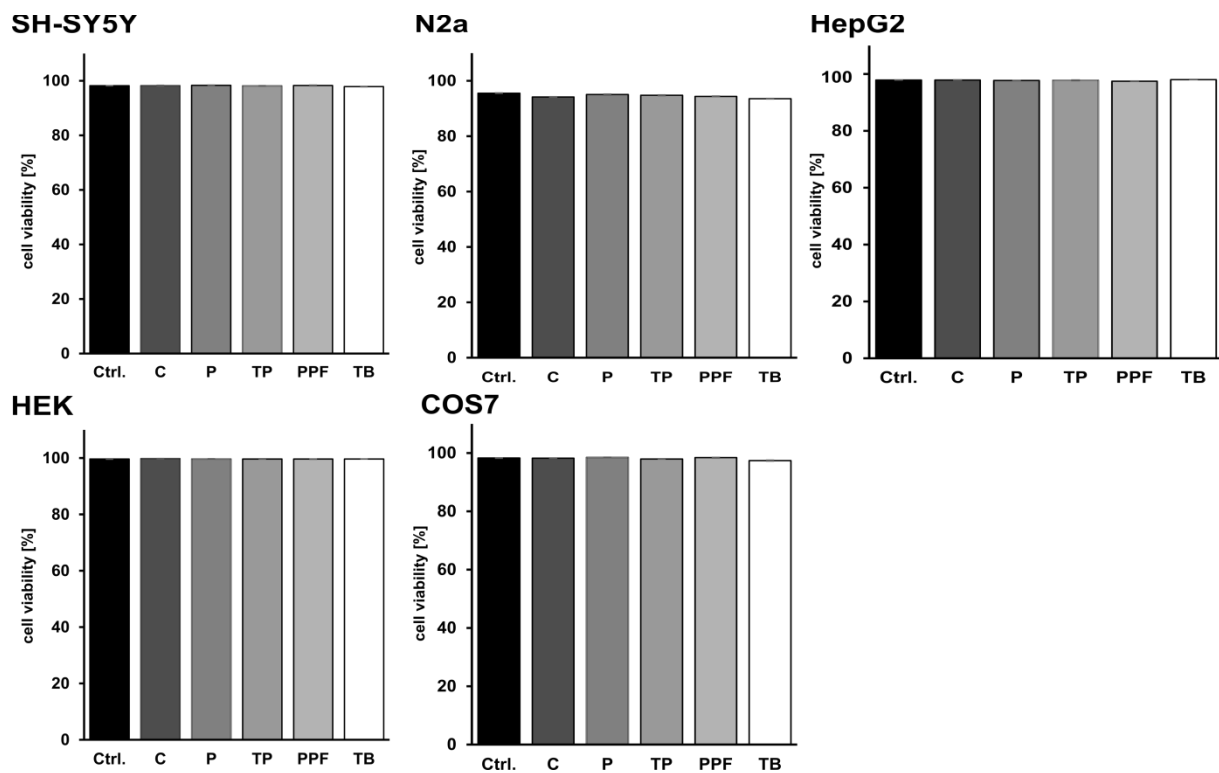

**Supplementary Figure S11:** Cell viability after treatment with different methylxanthines or solvent control in SH-SY5Y, N2a, HepG2, HEK and COS7 cells. Error bars represent the standard error of the mean (SEM).

**Supplemental Table 1.** Number of biological replicates for each analyzed cell line and each incubated methylxanthine.

| Cell line | Methylxanthine  | Biological replicates |
|-----------|-----------------|-----------------------|
| SH-SY5Y   | Solvent control | n=14                  |
|           | Caffeine        | n=9                   |
|           | Theophylline    | n=6                   |
|           | Pentoxifylline  | n=8                   |
|           | Theobromine     | n=6                   |
|           | Propentofylline | n=8                   |
| N2a       | Solvent control | n=6                   |
|           | Caffeine        | n=6                   |
|           | Theophylline    | n=6                   |
|           | Pentoxifylline  | n=6                   |
|           | Theobromine     | n=6                   |
|           | Propentofylline | n=6                   |
| HEK       | Solvent control | n=6                   |
|           | Caffeine        | n=6                   |
|           | Theophylline    | n=6                   |
|           | Pentoxifylline  | n=6                   |
|           | Theobromine     | n=6                   |
|           | Propentofylline | n=6                   |
| HepG2     | Solvent control | n=6                   |
|           | Caffeine        | n=6                   |
|           | Theophylline    | n=6                   |
|           | Pentoxifylline  | n=6                   |
|           | Theobromine     | n=6                   |
|           | Propentofylline | n=6                   |
| COS7      | Solvent control | n=6                   |
|           | Caffeine        | n=6                   |

|  |                 |     |
|--|-----------------|-----|
|  | Theophylline    | n=6 |
|  | Pentoxifylline  | n=6 |
|  | Theobromine     | n=5 |
|  | Propentofylline | n=5 |
