# Supplementary material for: Methylxanthines Induce a Change in the AD/Neurodegeneration-Linked Lipid Profile in Neuroblastoma Cells
Source: Int J Mol Sci. 2022 Feb 18;23(4):2295. doi: 10.3390/ijms23042295 (PMC8875332; doi:10.3390/ijms23042295)
Supplement: Supplementary file 1 [file ijms-23-02295-s001.zip › ijms-1376935_Supplement table 2.xlsx]

## Sheet: Supplement
SH-SY5Y	PC aa C20:0	PC aa C24:0	PC aa C26:0	PC aa C28:0	PC aa C28:1	PC aa C30:0	PC aa C30:2	PC aa C32:0	PC aa C32:1	PC aa C32:2	PC aa C32:3	PC aa C34:1	PC aa C34:2	PC aa C34:3	PC aa C34:4	PC aa C36:0	PC aa C36:1	PC aa C36:2	PC aa C36:3	PC aa C36:4	PC aa C36:5	PC aa C36:6	PC aa C38:0	PC aa C38:1	PC aa C38:3	PC aa C38:4	PC aa C38:5	PC aa C38:6	PC aa C40:0	PC aa C40:1	PC aa C40:2	PC aa C40:3	PC aa C40:4	PC aa C40:5	PC aa C40:6	PC aa C42:0	PC aa C42:1	PC aa C42:2	PC aa C42:4	PC aa C42:5	PC aa C42:6	PC aa C44:0	PC aa C48:0	PC ae C30:0	PC ae C30:1	PC ae C30:2	PC ae C32:1	PC ae C32:2	PC ae C34:0
	PC aa C20:0	PC aa C24:0	PC aa C26:0	PC aa C28:0	PC aa C28:1	PC aa C30:0	PC aa C30:2	PC aa C32:0	PC aa C32:1	PC aa C32:2	PC aa C32:3	PC aa C34:1	PC aa C34:2	PC aa C34:3	PC aa C34:4	PC aa C36:0	PC aa C36:1	PC aa C36:2	PC aa C36:3	PC aa C36:4	PC aa C36:5	PC aa C36:6	PC aa C38:0	PC aa C38:1	PC aa C38:3	PC aa C38:4	PC aa C38:5	PC aa C38:6	PC aa C40:0	PC aa C40:1	PC aa C40:2	PC aa C40:3	PC aa C40:4	PC aa C40:5	PC aa C40:6	PC aa C42:0	PC aa C42:1	PC aa C42:2	PC aa C42:4	PC aa C42:5	PC aa C42:6	PC aa C44:0	PC aa C48:0	PC ae C30:0	PC ae C30:1	PC ae C30:2	PC ae C32:1	PC ae C32:2	PC ae C34:0
Mean
ctrl	100	100	100	100	100	100	100	100	100	100	100	100	100	100	100	100	100	100	100	100	100	100	100	100	100	100	100	100	100	100	100	100	100	100	100	100	100	100	100	100	100	100	100	100	100	100	100	100	100
caffeine	99.6629	84.0387	86.5015	89.7663	90.4532	87.842	91.7045	87.2641	84.5035	86.6886	89.4038	81.9677	83.8371	87.3911	87.9884	84.2152	83.8469	82.0361	86.3711	88.4855	94.5128	93.4027	82.7238	84.2097	84.1528	87.117	93.0608	87.6508	79.9656	84.1381	84.7047	83.4173	86.6959	92.4211	89.8076	72.2761	75.3333	86.6044	87.3805	94.0513	93.4345	83.6828	102.9	93.962	90.344	89.0493	89.6936	87.1538	89.2344
theophylline	111.208	106.942	106.39	100.884	107.515	95.6715	112.99	91.5115	93.4013	98.6828	104.496	85.2062	92.6414	100.474	104.992	85.4131	84.0537	87.2107	97.1281	101.097	106.431	102.917	91.5404	86.5982	92.0501	93.0949	97.1153	93.3667	83.6306	88.3572	90.2209	90.1609	93.1901	100.493	93.4695	84.8838	84.1239	96.8172	87.5178	92.9054	92.4444	85.3984	120.819	99.5761	100.533	102.341	93.1808	94.7638	88.6372
pentoxifylline	87.2734	54.7951	57.3139	87.9448	76.4129	98.9951	86.5445	96.6774	93.848	85.4487	80.9034	95.9013	90.9987	88.1493	92.567	99.9449	98.4316	95.0175	94.9624	91.5653	87.0666	94.5472	102.052	104.266	98.7925	92.0466	91.6531	93.567	92.4453	90.9288	97.4108	95.3007	96.5474	96.9391	92.6933	79.9523	81.6231	97.3072	96.998	105.071	87.011	94.8981	102.056	150.112	100.612	83.1541	114.195	102.653	152.901
theobromine	82.1908	112.386	107.054	86.2354	91.9035	87.1977	78.2367	92.9725	90.0829	83.5944	83.1374	97.0563	92.191	85.607	80.1349	103.131	101.082	98.3991	90.5378	80.8767	80.827	87.1522	92.7162	97.5002	94.9982	89.2635	85.3321	90.6964	89.1355	88.758	98.8064	101.454	95.6574	90.7513	93.7104	84.7002	89.5551	85.1093	96.2978	90.1251	89.6873	73.0781	110.391	109.114	109.204	107.363	114.901	116.263	116.558
propentofylline	98.6148	86.1032	90.0727	86.6812	82.9013	87.5477	71.2652	84.4617	70.8976	65.2344	65.0889	72.0774	69.3645	68.776	76.7652	64.3461	63.5488	72.5428	74.0704	67.4225	77.8396	86.3777	78.7836	76.8171	76.5412	67.7871	79.5766	89.8732	77.4722	70.0349	68.7816	66.2145	73.4315	82.0859	86.1832	67.7754	66.9236	81.8786	74.3727	89.4534	78.3917	67.851	92.0862	110.188	84.1575	76.08	81.749	70.8478	92.2642
SEM
ctrl	5.60501	12.4934	12.1859	5.24492	5.96721	5.56693	5.65398	5.60418	6.14159	5.9231	6.145	6.31088	6.11166	6.06099	4.70246	7.01584	7.0797	6.46031	5.71472	5.89763	6.00822	5.28758	5.6979	5.98794	6.27144	5.8887	5.25774	4.97549	4.71931	5.72835	5.63898	6.29966	5.9154	5.10881	4.87775	4.1454	6.43637	4.07397	5.90742	5.25017	5.67412	7.45262	11.3163	5.69127	6.36353	5.78749	6.59519	7.05863	5.26287
caffeine	13.6467	31.9454	29.8692	12.9372	16.0679	9.76485	10.1161	9.01489	9.04988	9.01653	9.84159	9.6327	9.09611	9.36548	8.86485	10.7332	10.2084	10.0864	9.42485	10.4346	15.7114	14.7376	11.2438	9.90644	9.05055	10.4498	13.2938	13.8322	9.51024	10.0344	9.0491	9.03663	9.36913	11.0474	13.6558	11.8279	11.1804	10.5382	9.23785	8.10963	11.4452	17.2535	16.0499	6.0639	6.61203	6.90381	6.63228	6.73	4.97976
theophylline	11.8423	31.9549	32.8906	8.73982	14.9524	6.4609	7.15873	7.19441	6.51797	7.51422	7.61092	5.5259	6.82701	7.65127	5.95751	5.79725	5.7686	6.06368	7.12046	8.10848	13.3628	12.6799	5.85306	7.01893	7.46047	8.32577	9.51072	12.0961	7.99605	6.27115	6.97465	8.79557	9.19094	8.5019	11.0927	10.4584	10.1312	8.38627	10.1663	8.87586	10.2081	13.8938	18.1582	5.03239	5.8313	9.3518	7.01099	8.1421	4.74385
pentoxifylline	5.81651	8.25539	8.74047	7.30033	11.2023	5.88731	10.2611	4.81703	5.55115	8.65434	12.7209	5.01653	5.69211	8.04686	5.25198	6.89964	6.60192	5.57379	6.2233	6.64644	5.92254	6.67856	9.60524	5.91304	6.40575	7.05718	6.76049	7.0372	9.53354	5.40365	5.84997	7.12614	8.01617	7.62868	5.85083	10.5338	5.45985	6.65608	8.77481	9.85431	10.1505	6.26514	14.9947	18.6496	4.20106	4.3448	8.59527	5.06276	20.0456
theobromine	5.81584	15.3961	13.3809	8.59909	7.3266	9.20095	9.46621	9.04252	10.103	10.5178	11.2111	10.2571	11.2404	11.1212	8.48084	10.1533	10.3218	11.1489	9.8822	9.07607	8.67362	7.39871	9.63761	8.79845	9.91522	10.1712	7.67635	8.57659	9.58981	6.77205	8.20372	9.62014	8.72524	6.2758	9.26451	7.33098	8.59405	4.78589	7.60868	6.32493	6.25309	11.7165	10.1321	6.9489	7.09866	7.00795	10.5216	10.6859	7.2606
propentofylline	9.97105	28.537	29.2415	14.2244	19.1409	10.8718	13.101	10.954	10.1768	12.2015	14.2028	8.92305	10.7477	12.1818	8.75086	8.64913	8.66241	9.25301	9.95518	10.2943	17.7865	15.3559	7.21769	8.5114	8.84371	9.60648	13.3293	13.8598	9.30371	9.94861	8.37849	8.36897	8.43082	10.0432	13.6078	13.447	10.7609	10.4584	9.23239	10.1592	11.5609	16.2573	29.0873	5.97641	7.45381	10.4467	8.41767	8.65848	6.60291
dunnets P ctrl vs
caffeine	1	0.96706	0.983659	0.851158	0.955155	0.602247	0.904037	0.524599	0.317486	0.523471	0.814639	0.184642	0.299882	0.605805	0.4432	0.395527	0.354725	0.228908	0.455666	0.649005	0.994426	0.983054	0.293989	0.306332	0.323111	0.553867	0.962708	0.76125	0.115349	0.247955	0.271603	0.283987	0.513405	0.915498	0.857054	0.0182759	0.0439311	0.430015	0.583395	0.9692	0.966358	0.631875	0.999977	0.995672	0.685304	0.615716	0.790193	0.563185	0.957272
theophylline	0.886632	0.999614	0.999738	0.999999	0.990933	0.994936	0.731874	0.900434	0.96051	0.999985	0.99682	0.492042	0.944323	1	0.979117	0.604283	0.50031	0.677109	0.999138	0.999994	0.993728	0.999805	0.924403	0.598016	0.926331	0.961893	0.999642	0.986405	0.39113	0.670227	0.793438	0.844312	0.962646	1	0.985517	0.509571	0.462579	0.99827	0.709576	0.96316	0.965295	0.815088	0.894919	1	1	0.999583	0.972221	0.988715	0.969126
pentoxifylline	0.76514	0.34268	0.395906	0.776947	0.403005	0.999993	0.621681	0.997287	0.956085	0.471175	0.329683	0.992289	0.836079	0.692385	0.856925	1	0.999949	0.985368	0.981924	0.877413	0.841646	0.993874	0.999811	0.991176	0.999982	0.904079	0.932783	0.981879	0.902235	0.786009	0.998811	0.987817	0.997208	0.998643	0.964699	0.162719	0.231499	0.998766	0.998686	0.986776	0.682358	0.996269	0.999997	0.0126133	0.999999	0.236445	0.556986	0.999263	0.0128512
theobromine	0.562901	0.993961	0.999576	0.751594	0.987332	0.674617	0.250132	0.951597	0.822751	0.447303	0.548647	0.998957	0.929853	0.60627	0.125157	0.999139	0.999995	0.999959	0.853754	0.286441	0.626744	0.861166	0.957974	0.999549	0.989351	0.807919	0.686526	0.943754	0.763325	0.699315	0.999983	0.999972	0.994808	0.892368	0.987724	0.49746	0.814788	0.457179	0.997745	0.87029	0.884842	0.274946	0.994239	0.984715	0.814131	0.927786	0.602266	0.461209	0.868831
propentofylline	0.999988	0.984413	0.996564	0.703342	0.706231	0.614061	0.0381518	0.362643	0.0122698	0.0037725	0.0126074	0.0169811	0.00954944	0.0141954	0.0271241	0.00452589	0.00294337	0.0290151	0.0335008	0.00649944	0.390891	0.772223	0.156615	0.0672911	0.0711491	0.00796696	0.278417	0.889083	0.0752134	0.00567353	0.00335734	0.00395953	0.0357551	0.288294	0.679715	0.0066738	0.00526072	0.187444	0.051691	0.780659	0.204562	0.0843648	0.997463	0.963022	0.249414	0.040178	0.308762	0.0201152	0.991205
N2a	PC aa C20:0	PC aa C24:0	PC aa C26:0	PC aa C28:0	PC aa C28:1	PC aa C30:0	PC aa C30:2	PC aa C32:0	PC aa C32:1	PC aa C32:2	PC aa C32:3	PC aa C34:1	PC aa C34:2	PC aa C34:3	PC aa C34:4	PC aa C36:0	PC aa C36:1	PC aa C36:2	PC aa C36:3	PC aa C36:4	PC aa C36:5	PC aa C36:6	PC aa C38:0	PC aa C38:1	PC aa C38:3	PC aa C38:4	PC aa C38:5	PC aa C38:6	PC aa C40:0	PC aa C40:1	PC aa C40:2	PC aa C40:3	PC aa C40:4	PC aa C40:5	PC aa C40:6	PC aa C42:0	PC aa C42:1	PC aa C42:2	PC aa C42:4	PC aa C42:5	PC aa C42:6	PC aa C44:0	PC aa C48:0	PC ae C30:0	PC ae C30:1	PC ae C30:2	PC ae C32:1	PC ae C32:2	PC ae C34:0
Mean
ctrl	100	100	100	100	100	100	100	100	100	100	100	100	100	100	100	100	100	100	100	100	100	100	100	100	100	100	100	100	100	100	100	100	100	100	100	100	100	100	100	100	100	100	100	100	100	100	100	100	100
caffeine	90.3638	85.6719	91.61	91.1853	86.1992	95.1708	78.7237	94.0562	84.8392	79.6623	79.1073	83.8191	81.4809	82.8599	84.6147	81.9194	80.9122	81.5437	79.4926	85.6673	82.6059	86.2617	82.2336	88.433	79.6913	79.7757	84.0857	85.6763	80.8283	87.2924	86.6073	83.4077	83.1246	83.6899	92.3657	79.8657	91.1374	86.842	81.2494	85.3982	89.0661	85.1702	106.046	95.281	90.9989	89.3945	89.094	90.5176	94.1723
theophylline	95.6289	137.693	138.074	101.119	127.783	94.3139	79.8338	83.9261	83.7552	82.2793	84.9624	78.2433	88.2063	78.0949	93.3155	72.6227	73.0992	86.0438	75.3014	73.9283	93.7342	85.9957	85.0095	79.2912	69.7994	66.5115	78.6944	86.6797	94.4002	84.072	81.3588	74.2113	68.0774	78.212	85.9392	86.7724	84.4495	83.0089	80.3692	84.7593	90.996	92.5152	107.666	94.9085	96.3427	96.9936	83.6908	81.7355	84.4776
pentoxifylline	84.8217	85.5363	89.0667	81.141	78.5516	86.2654	74.5145	88.9632	82.2969	77.3544	70.5623	76.127	79.3664	74.934	77.0151	71.9485	69.9459	75.7917	71.36	78.1425	73.0411	76.8397	65.0444	79.6799	72.757	70.9689	80.7752	78.7575	61.0361	73.8217	77.4695	71.4224	72.3455	75.8284	82.9892	63.7291	80.6112	77.8258	66.7295	73.9723	78.5634	71.046	101.388	100.031	94.2382	86.7542	98.7963	101.051	105.6
theobromine	96.6608	107.321	112.543	81.508	87.3421	83.8242	75.8048	93.0026	84.1156	85.639	87.3713	81.8696	82.8109	91.0695	83.0152	78.2251	77.3648	76.2285	83.8359	100.335	91.2548	87.8121	77.9986	84.3516	88.1503	92.5093	96.7332	96.5573	73.852	90.4809	87.1795	88.7779	95.5908	97.4068	100.879	78.1727	94.1468	92.963	95.2785	97.7058	101.932	87.6504	108.23	95.2004	100.32	109.541	93.8264	103.454	103.803
propentofylline	87.5819	102.268	107.515	83.9711	93.7526	77.5828	79.6487	80.8569	81.0871	79.3599	73.517	75.5745	83.3356	75.1635	74.4855	68.1376	68.7394	73.9382	66.82	74.6409	80.2779	77.1684	64.8457	76.3339	65.3182	60.4496	80.5305	83.4868	60.1052	72.91	75.0876	58.2189	61.7724	77.7513	87.1622	63.322	86.9061	76.8621	66.7336	75.6557	84.3281	70.3275	102.054	102.195	102.978	100.031	96.2541	104.952	104.69
SEM
ctrl	5.61706	23.3914	19.6882	13.1677	14.2716	10.5379	7.76921	12.5776	10.6023	13.1101	13.9807	12.4349	8.97261	10.7506	8.93776	13.8251	12.4242	11.1136	12.6385	12.9178	13.1458	13.9665	15.0602	11.9712	13.9067	15.2226	14.5906	12.5619	11.2488	13.0212	12.5591	15.0168	16.5088	18.6292	15.0899	13.6686	14.7409	15.2735	14.7328	15.6818	17.5092	15.2612	10.4348	3.12748	3.31013	6.86474	2.68096	4.86083	3.84704
caffeine	9.87061	20.3274	21.2005	12.4729	15.5632	12.6865	9.17453	12.0604	13.7812	13.3956	10.9523	11.8591	11.0142	11.8467	7.26662	11.9312	12.3513	12.931	11.8619	11.416	9.58252	11.8036	11.6649	12.0782	11.1377	11.5929	10.9756	10.8978	11.5234	12.2568	12.6627	11.2042	10.7272	10.5077	10.4788	11.2918	11.8364	12.2596	11.1342	11.1639	9.86541	10.2497	11.4588	8.9553	7.67329	11.2468	8.80873	9.09021	8.22866
theophylline	7.33191	26.8697	24.9538	8.55559	19.0453	8.48889	9.22224	9.95025	9.07253	9.40447	9.27702	7.86769	9.80282	9.10215	6.22969	8.10388	8.82924	8.85912	8.95984	8.58295	9.70393	7.93342	9.66072	8.51335	9.56865	8.4448	7.27775	8.73833	8.58591	7.56003	8.28865	8.07571	9.0524	9.91606	9.89057	8.56342	9.26472	9.07953	8.95974	9.84668	10.2584	6.94691	10.4004	8.47434	11.4003	17.4809	7.85619	7.91793	8.61454
pentoxifylline	5.74968	16.9074	15.5836	4.59129	10.5838	5.77155	3.41293	4.88454	4.09522	3.88751	2.74231	4.17833	4.4315	4.24429	5.04997	4.68268	4.64803	4.47953	3.81424	4.05007	4.03144	3.97444	5.50092	4.35887	4.33432	4.57186	4.13972	4.20155	7.54527	4.19448	3.70764	4.33072	5.10097	3.08179	4.12176	5.25299	4.64122	4.25083	4.00592	4.46805	6.69233	5.70802	7.6957	4.06049	3.11884	6.37552	4.35816	6.2328	2.78472
theobromine	6.51136	17.6333	19.6937	3.55188	11.3797	4.2416	3.84156	5.06266	4.51652	2.48863	5.11848	5.16088	3.96678	3.98894	5.29551	5.62645	6.1844	5.099	7.06819	8.16678	4.80554	4.5962	7.37885	7.77979	6.67701	8.47504	5.68428	5.58111	8.21282	6.9727	6.76809	5.86075	8.14142	3.52882	3.65655	8.25827	6.32728	7.12464	6.75648	6.82429	3.20184	7.33177	7.36796	5.59819	3.64366	5.76782	5.4477	7.32618	7.26696
propentofylline	4.79807	20.5053	17.6067	7.33993	13.8556	5.69332	6.65731	6.5036	6.14528	5.27273	5.41505	5.3385	4.15085	4.50303	2.93793	4.98759	4.21129	4.34952	4.67611	4.3461	6.18121	5.45038	4.89943	5.65595	3.72373	3.86933	6.00932	4.87972	6.28442	5.11189	6.15863	4.50263	4.75242	5.63437	5.86518	5.90535	5.65501	5.46694	3.88994	5.55288	7.41077	5.71259	5.70694	2.87927	4.77789	7.96713	4.63463	6.61944	5.05913
dunnets P ctrl vs
caffeine	0.725062	0.990028	0.999006	0.919118	0.944475	0.990682	0.0639318	0.982172	0.508489	0.266887	0.240377	0.418495	0.211123	0.311437	0.218491	0.35341	0.274172	0.29247	0.226923	0.599042	0.397671	0.633363	0.460024	0.753247	0.257688	0.324426	0.510607	0.562245	0.286953	0.695416	0.653859	0.467812	0.538537	0.612047	0.954514	0.290043	0.92712	0.744972	0.370542	0.669711	0.883793	0.605546	0.988587	0.967399	0.750883	0.902138	0.486923	0.784417	0.938279
theophylline	0.983929	0.673672	0.63479	0.999994	0.54945	0.981021	0.0853721	0.534661	0.44427	0.387938	0.534669	0.173004	0.609778	0.131192	0.868981	0.0727565	0.0655429	0.547495	0.107875	0.110771	0.970342	0.617115	0.614253	0.252227	0.0426322	0.035524	0.249136	0.625988	0.979231	0.500412	0.35513	0.117684	0.0644986	0.347453	0.670194	0.666449	0.607441	0.5353	0.329309	0.63455	0.942469	0.9538	0.968677	0.955812	0.991566	0.999615	0.151809	0.232254	0.270593
pentoxifylline	0.326539	0.989605	0.996539	0.399687	0.757743	0.621687	0.0199772	0.81954	0.364715	0.184944	0.0514164	0.116991	0.138813	0.0676734	0.0296124	0.0634039	0.0333053	0.10531	0.0488945	0.2238	0.0826542	0.180147	0.0298806	0.267495	0.076385	0.0808627	0.336215	0.213584	0.0050127	0.106649	0.198905	0.0705326	0.130435	0.258123	0.503263	0.0144513	0.405379	0.29223	0.031258	0.172299	0.385268	0.0810044	0.99999	1	0.943443	0.798744	0.999923	0.999987	0.947014
theobromine	0.995151	0.999568	0.993503	0.417897	0.960429	0.473967	0.0289915	0.964821	0.465054	0.58148	0.684448	0.315238	0.26958	0.836872	0.150388	0.200143	0.149476	0.1147	0.43417	1	0.894368	0.727446	0.268099	0.503383	0.727411	0.954057	0.99862	0.997775	0.0842604	0.869471	0.688793	0.786095	0.996292	0.999766	0.999998	0.224654	0.98646	0.97138	0.992828	0.999843	0.999951	0.749157	0.958285	0.965082	1	0.933372	0.885815	0.99593	0.98943
propentofylline	0.511326	0.999999	0.999414	0.550352	0.998262	0.193311	0.0813968	0.372748	0.306124	0.254914	0.0916013	0.105421	0.295803	0.0713614	0.0138335	0.0289746	0.0256232	0.0728312	0.0182345	0.125555	0.28588	0.190258	0.0289111	0.155945	0.0162604	0.0102991	0.325156	0.430853	0.00396653	0.0905538	0.133778	0.00432917	0.0202213	0.328791	0.738794	0.0132974	0.742934	0.257028	0.0314534	0.220157	0.666716	0.0713862	0.999932	0.998956	0.99669	1	0.983785	0.979827	0.973999
HEPG2	PC aa C20:0	PC aa C24:0	PC aa C26:0	PC aa C28:0	PC aa C28:1	PC aa C30:0	PC aa C30:2	PC aa C32:0	PC aa C32:1	PC aa C32:2	PC aa C32:3	PC aa C34:1	PC aa C34:2	PC aa C34:3	PC aa C34:4	PC aa C36:0	PC aa C36:1	PC aa C36:2	PC aa C36:3	PC aa C36:4	PC aa C36:5	PC aa C36:6	PC aa C38:0	PC aa C38:1	PC aa C38:3	PC aa C38:4	PC aa C38:5	PC aa C38:6	PC aa C40:0	PC aa C40:1	PC aa C40:2	PC aa C40:3	PC aa C40:4	PC aa C40:5	PC aa C40:6	PC aa C42:0	PC aa C42:1	PC aa C42:2	PC aa C42:4	PC aa C42:5	PC aa C42:6	PC aa C44:0	PC aa C48:0	PC ae C30:0	PC ae C30:1	PC ae C30:2	PC ae C32:1	PC ae C32:2	PC ae C34:0
Mean
ctrl	100	100	100	100	100	100	100	100	100	100	100	100	100	100	100	100	100	100	100	100	100	100	100	100	100	100	100	100	100	100	100	100	100	100	100	100	100	100	100	100	100	100	100	100	100	100	100	100	100
caffeine	95.065	104.872	82.6007	88.5262	95.5589	87.7082	129.905	109.487	62.7426	82.0606	101.568	62.4097	40.9262	41.9602	109.267	104.704	77.7811	44.1608	45.4116	43.333	50.5856	111.316	107.098	113.461	78.5761	51.8194	55.3495	79.239	105.068	106.797	86.8767	65.8714	59.276	75.6473	64.7385	115.75	101.862	96.823	74.6155	78.6334	100.162	114.348	122.827	128.748	134.02	127.926	150.579	123.286	136.362
theophylline	99.3339	74.6798	66.4598	76.6153	94.9104	91.4071	120.954	106.815	72.9871	87.812	103.175	75.4107	61.8067	62.2632	110.991	105.684	87.5748	65.8547	63.934	70.5518	70.4316	110.025	106.399	109.315	86.4797	74.3795	79.8767	85.3771	98.8795	99.5921	92.184	73.214	69.6573	88.4344	78.59	103.535	89.1893	95.3074	80.1465	76.9593	74.199	94.6275	91.2208	114.989	120.744	113.729	135.236	114.976	123.222
pentoxifylline	102.333	105.908	94.1957	98.1066	113.418	98.1252	148.674	108.373	76.6184	96.2153	114.749	75.9316	62.5288	63.2354	113.317	106.124	86.2436	65.2614	65.5043	64.3301	71.1743	118.278	103.749	108.12	92.4533	74.7105	80.43	94.7617	108.089	97.6043	91.1333	76.4458	75.483	92.3801	84.2028	124.231	113.017	102.753	90.4094	90.2855	98.689	111.594	93.1579	129.997	144.73	135.193	150.584	123.409	134.001
theobromine	106.524	162.841	154.357	134.669	119.726	108.933	91.9567	107.292	108.639	103.61	108.183	113.04	116.725	115.808	147.766	103.963	110.087	119.723	112.727	114.716	133.975	109.81	96.635	86.1425	102.495	116.959	125.505	117.78	109.63	100.977	100.52	102.661	113.556	121.266	122.499	104.851	111.901	112.116	117.816	127.403	127.669	93.038	121.966	122.407	104.83	109.437	112.506	109.105	109.288
propentofylline	110.759	131.928	124.297	127.958	127.955	121.768	134.883	115.368	111.877	119.366	116.943	115.975	117.757	114.94	136.471	116.736	110.438	120.81	109.649	105.291	120.365	123.908	113.907	105.532	114.836	115.839	132.065	125.556	113.768	110.451	110.457	107.054	120.47	129.511	130.481	107.733	114.482	124.101	120.995	122.288	123.1	115.442	122.9	129.738	128.139	121.633	140.018	119.095	127.618
SEM
ctrl	4.14804	7.47128	6.85216	6.61513	6.4509	9.38175	10.4571	10.3264	13.1407	10.4382	8.49287	14.2652	17.2146	16.3826	22.6346	10.4926	11.524	16.8203	17.1412	18.933	15.612	10.2702	10.3695	9.87866	11.401	16.7535	16.8756	13.989	13.9996	10.146	11.9136	13.4086	16.8597	14.2636	14.9588	10.5756	13.7745	14.5683	15.6918	12.2162	8.92231	10.5706	15.3255	8.80195	9.50301	9.82231	11.6041	10.3502	9.99383
caffeine	4.31662	16.8833	16.6775	12.9106	6.24359	5.80785	6.44236	6.07052	7.10312	7.22253	5.52009	8.23148	9.42952	9.64639	22.604	6.63511	7.47443	8.77683	10.4495	12.0791	9.46201	5.15449	6.63737	6.37722	7.68723	9.74496	8.21497	8.15746	10.7829	7.49092	8.27023	8.94252	8.14597	7.32491	9.12026	8.61017	5.80642	8.9602	9.08492	11.9856	14.6499	8.39067	9.11384	2.5346	3.58985	5.248	3.7344	4.61358	2.99817
theophylline	3.36984	23.1702	18.6354	12.1293	5.42106	5.66743	7.08753	5.88242	6.55793	6.94552	6.62602	7.43095	8.93474	7.90318	17.6044	6.56686	7.06012	8.859	8.31582	9.78538	9.948	6.06821	6.11512	6.73162	6.8949	8.86632	9.78253	6.73451	6.69172	6.96558	7.04832	6.45243	7.67982	7.61946	7.81399	8.20619	8.19809	7.84424	9.26496	6.45577	11.4555	12.901	9.46258	5.16814	4.9916	5.40858	7.43253	5.46545	5.93691
pentoxifylline	3.81219	21.7543	21.423	14.6675	6.80849	6.06971	7.07997	5.85953	7.89688	6.60749	6.99287	7.47636	10.6295	11.6481	19.0723	7.02686	6.76422	9.3109	10.1216	10.6363	12.6199	6.48525	6.57857	6.16807	7.43691	9.80256	10.041	5.72476	8.06223	6.11946	4.84002	8.39333	7.99237	7.65102	8.12577	8.05159	9.05471	7.9583	7.05107	10.9674	16.8536	13.6415	14.5975	6.2867	5.76354	7.69705	5.62619	6.85068	6.04976
theobromine	5.10902	21.6987	20.2549	14.0169	11.2346	6.22884	7.9414	8.56608	8.70892	8.33188	9.49958	9.45804	10.421	11.2188	10.1952	10.3084	11.3529	11.2414	11.8197	10.4436	10.5556	7.58569	10.7303	8.64452	11.2405	12.7219	9.95068	10.8801	19.1266	11.1123	11.2331	11.4707	11.3441	10.4659	11.5922	17.4608	18.3418	15.4293	13.8038	8.86257	8.75844	12.9965	27.6577	9.62829	6.3895	9.65898	8.30967	6.7983	8.18968
propentofylline	3.51062	17.6565	17.6695	11.7362	5.67311	2.67645	9.66706	5.84852	5.66374	3.71267	8.01498	5.02892	8.28163	8.36054	14.5117	8.07948	5.65483	6.6919	7.54944	6.36821	8.75263	7.42201	7.02929	8.92161	4.97178	6.6312	6.65021	4.30602	8.01279	7.07974	6.72089	6.53513	7.40336	7.44358	5.82814	9.13507	9.41116	9.16518	10.2369	7.53506	9.80244	14.8503	15.873	4.72147	5.94487	6.94025	7.67408	6.01764	7.10333
dunnets P ctrl vs
caffeine	0.871501	0.999929	0.952328	0.95823	0.994279	0.504451	0.148175	0.854604	0.0105523	0.298319	0.999964	0.0176265	0.00133572	0.00156168	0.997757	0.99484	0.252541	0.00219491	0.00325244	0.00290535	0.0130718	0.783677	0.961535	0.654683	0.263525	0.0139653	0.0223824	0.366489	0.99867	0.970542	0.716994	0.0412669	0.03291	0.299397	0.0722585	0.802338	0.999989	0.999803	0.407115	0.408936	1	0.899088	0.860124	0.0564873	0.0111144	0.123687	0.00316702	0.148944	0.0152374
theophylline	0.999985	0.887173	0.622502	0.60339	0.989461	0.790065	0.438155	0.955993	0.0884246	0.646918	0.998883	0.183297	0.0523598	0.0549682	0.995054	0.987958	0.75282	0.0904194	0.0738802	0.202385	0.220137	0.850556	0.974832	0.881195	0.673204	0.324191	0.533452	0.680019	0.999999	1	0.948549	0.144844	0.155313	0.873639	0.430331	0.999646	0.957208	0.998708	0.630479	0.34014	0.450795	0.998473	0.997273	0.53069	0.191836	0.710411	0.0542608	0.519007	0.186827
pentoxifylline	0.993729	0.999817	0.999668	0.999991	0.661667	0.999659	0.00682882	0.904771	0.167784	0.995358	0.593333	0.198209	0.0580932	0.0633685	0.988282	0.983347	0.677579	0.0825947	0.0924773	0.0892093	0.239606	0.382014	0.997688	0.926936	0.950075	0.335552	0.558681	0.99262	0.988576	0.999758	0.917401	0.233994	0.318384	0.973916	0.697653	0.455759	0.913569	0.999903	0.965435	0.929547	0.999998	0.954366	0.999162	0.0438304	0.000790172	0.0351242	0.00330171	0.145674	0.0251572
theobromine	0.706542	0.195688	0.198802	0.249729	0.314899	0.765369	0.967804	0.942753	0.903845	0.996263	0.929997	0.725022	0.669621	0.710548	0.362606	0.997664	0.868845	0.516288	0.849323	0.78346	0.127988	0.860702	0.99861	0.630447	0.999662	0.691578	0.315719	0.510066	0.975828	0.999997	1	0.999651	0.809024	0.42146	0.384279	0.99838	0.937902	0.921166	0.716512	0.198495	0.385808	0.994884	0.876878	0.182936	0.986753	0.909248	0.817425	0.870767	0.885054
propentofylline	0.266071	0.766974	0.843318	0.440154	0.0819718	0.0752761	0.0715943	0.499933	0.739521	0.235545	0.466787	0.557493	0.619927	0.751021	0.609578	0.539386	0.853278	0.466562	0.943287	0.996137	0.550777	0.165247	0.654131	0.984449	0.595116	0.741975	0.143787	0.194969	0.903341	0.854743	0.854466	0.969762	0.483877	0.154722	0.144705	0.986375	0.874802	0.474067	0.581914	0.370086	0.5529	0.87038	0.85868	0.0464324	0.0438698	0.30889	0.0237875	0.297085	0.0878459
HEK	PC aa C20:0	PC aa C24:0	PC aa C26:0	PC aa C28:0	PC aa C28:1	PC aa C30:0	PC aa C30:2	PC aa C32:0	PC aa C32:1	PC aa C32:2	PC aa C32:3	PC aa C34:1	PC aa C34:2	PC aa C34:3	PC aa C34:4	PC aa C36:0	PC aa C36:1	PC aa C36:2	PC aa C36:3	PC aa C36:4	PC aa C36:5	PC aa C36:6	PC aa C38:0	PC aa C38:1	PC aa C38:3	PC aa C38:4	PC aa C38:5	PC aa C38:6	PC aa C40:0	PC aa C40:1	PC aa C40:2	PC aa C40:3	PC aa C40:4	PC aa C40:5	PC aa C40:6	PC aa C42:0	PC aa C42:1	PC aa C42:2	PC aa C42:4	PC aa C42:5	PC aa C42:6	PC aa C44:0	PC aa C48:0	PC ae C30:0	PC ae C30:1	PC ae C30:2	PC ae C32:1	PC ae C32:2	PC ae C34:0
Mean
ctrl	100	100	100	100	100	100	100	100	100	100	100	100	100	100	100	100	100	100	100	100	100	100	100	100	100	100	100	100	100	100	100	100	100	100	100	100	100	100	100	100	100	100	100	100	100	100	100	100	100
caffeine	92.4581	92.0256	104.384	101.741	107.528	101.389	102.124	109.773	108.828	103.729	92.7069	115.505	110.423	104.379	113.505	121.172	113.316	111.812	113.376	129.817	130.204	129.99	102.9	114.288	103.057	118.034	122.555	130.019	110.044	101.459	98.7885	94.1319	105.623	119.047	131.55	112.054	110.195	104.476	102.134	114.649	130.329	120.317	165.27	98.9281	158.318	172.468	114.131	169.633	135.167
theophylline	144.938	221.727	230.088	148.97	206.834	116.102	125.487	119.332	121.906	116.559	111.215	118.305	121.615	113.865	117.673	125.774	121.565	127.55	119.331	119.525	213.249	154.066	138.133	130.605	116.915	126.687	206.68	141.683	134.728	118.938	113.201	115.852	117.656	186.785	185.033	148.551	138.541	119.997	108.678	136.174	186.687	148.717	182.734	115.63	123.996	163.722	121.731	118.101	105.127
pentoxifylline	89.3739	58.2717	62.5551	76.1417	75.6243	82.4062	88.2688	90.6215	92.7839	88.6313	82.0928	95.9497	93.7777	85.2975	95.0573	101.376	95.18	96.0427	94.2072	110.568	87.6892	98.7508	87.8007	93.439	85.5341	103.164	80.3385	109.327	96.0573	83.3834	76.2342	71.3374	88.699	87.3568	99.7746	94.0486	95.6292	86.2866	79.4189	93.7233	90.8025	110.709	137.853	74.8755	127.27	142.672	92.0323	147.677	106.279
theobromine	85.0686	46.208	43.2429	47.2069	41.4332	73.2543	56.0204	66.0871	61.7639	49.0508	46.2637	74.8025	55.3323	51.5777	88.8584	107.561	91.5671	62.9511	59.9867	102.898	84.1331	103.064	130.278	106.979	64.197	93.7639	68.0457	109.185	93.1758	84.5733	67.1683	58.685	82.1612	92.4777	89.6573	86.9957	80.79	64.4143	104.472	103.967	87.2269	92.69	101.374	84.4358	77.533	95.947	71.2307	96.2247	136.491
propentofylline	88.3533	56.9477	60.7331	66.4559	74.5341	67.8349	79.9255	76.3832	75.508	72.9517	69.6805	77.5796	79.1398	70.9212	63.5602	80.4259	76.8057	87.1918	76.7196	75.617	74.7027	90.2669	75.6769	75.5153	71.9951	76.3673	67.2203	75.436	84.0112	71.5258	62.0157	50.8005	66.9477	70.118	79.9744	83.2939	85.6321	74.6712	59.5606	69.595	71.3587	101.39	113.97	81.3285	118.435	116.918	96.4933	129.822	108.375
SEM
ctrl	14.5028	40.4246	42.5459	9.29138	23.917	3.20465	4.13766	4.1352	5.05084	5.62915	4.76964	5.83571	5.94422	5.44886	4.22006	5.48581	5.38551	6.67934	6.72923	5.65417	30.8655	6.87041	8.03558	6.38192	7.18752	4.98889	31.1593	6.51174	6.66181	6.85295	5.68753	5.54818	5.48815	22.6486	17.674	4.51479	5.39817	4.81573	7.00132	8.5716	19.4572	6.48454	18.7857	9.06871	11.0807	8.10675	12.0764	14.0246	11.0043
caffeine	13.2142	35.5504	37.2447	11.8382	24.9557	4.52798	5.21817	4.16563	3.20048	2.82325	5.08226	2.98903	3.07191	3.00102	2.967	4.43669	3.6131	3.68444	3.1861	3.12974	26.5436	12.3953	5.59941	4.79957	4.22617	6.12011	29.0849	8.61	6.94824	5.68961	3.84858	5.24045	6.93558	21.2403	17.9858	6.71495	6.51552	3.94717	5.16976	11.1165	21.0762	5.87199	22.0954	3.54977	5.67659	4.40767	4.75518	7.26284	4.45305
theophylline	15.7069	27.5633	28.6949	16.0766	22.6344	11.2794	12.6725	10.7538	11.1355	11.1618	11.7979	10.3512	11.0439	11.2806	11.2076	10.6258	10.6666	11.3791	11.6348	12.1414	27.3051	17.0909	12.0592	11.5697	11.6931	14.288	27.1893	16.7321	14.3411	12.5165	11.3105	11.2679	12.5973	23.8161	22.737	14.8025	15.4591	12.3422	13.19	15.1425	23.0052	12.0961	13.3428	8.27033	9.25376	9.87397	9.04059	9.90669	8.60492
pentoxifylline	9.55479	26.9624	27.9721	13.5542	20.7705	11.2745	11.8824	11.1481	10.7424	10.8742	10.2938	9.93936	10.7546	11.3037	10.4061	11.2011	11.0128	10.5396	10.5949	10.0043	18.7513	13.878	9.94006	11.0717	10.9043	11.1503	19.2811	11.0869	12.2591	10.9888	10.8483	13.4729	11.5196	16.6354	16.0929	11.0196	11.6626	12.3009	11.3345	13.8058	15.2471	11.0783	13.1765	8.10528	7.78897	7.64018	7.51698	7.74058	8.39419
theobromine	5.11639	14.7088	14.7325	5.2808	6.29179	12.0283	8.6096	5.03328	8.60892	18.0209	16.7891	7.59211	14.0357	12.335	11.208	12.7695	9.07403	11.3162	9.81088	13.7827	24.6418	16.9173	29.2213	14.8048	8.37501	14.4781	18.0693	17.6038	18.1918	11.0101	8.24607	8.55403	14.5225	20.8027	16.8278	16.2638	8.23828	11.0608	27.3685	17.352	13.8026	18.4159	10.1859	21.1478	8.86835	10.5145	12.9176	10.7173	22.0828
propentofylline	9.5409	35.2529	35.9342	12.8836	26.0613	7.37173	9.39626	7.24124	6.66383	6.96132	8.57489	6.43258	6.43983	6.10918	13.717	6.92613	6.79367	5.86199	5.86219	6.02648	31.0533	11.0271	5.59879	6.71993	6.35997	8.17613	33.3303	12.5573	7.06519	8.43875	7.1531	7.33581	10.3137	23.531	22.4033	7.86295	7.46729	7.16215	8.12152	13.5674	23.6591	7.48348	22.3224	5.93117	6.4597	6.02952	6.4823	6.83398	6.49039
dunnets P ctrl vs
caffeine	0.992904	0.999906	0.999997	0.999993	0.999727	0.999978	0.999897	0.82978	0.892924	0.997583	0.94938	0.469867	0.843207	0.993162	0.726707	0.427867	0.690241	0.797722	0.672896	0.158599	0.95197	0.567237	0.999984	0.807348	0.998988	0.685071	0.983176	0.486234	0.969328	0.999985	0.999983	0.975543	0.993414	0.978337	0.817349	0.933576	0.949058	0.995585	0.999989	0.923095	0.848969	0.663852	0.211021	0.999998	0.000630004	0.000131282	0.686103	0.000806943	0.320263
theophylline	0.085169	0.0713615	0.0798187	0.0461398	0.0298356	0.495204	0.193008	0.274199	0.207053	0.486115	0.780335	0.317887	0.256939	0.588524	0.499243	0.254076	0.263496	0.120012	0.342458	0.516567	0.0906303	0.0974986	0.432021	0.182441	0.452418	0.335099	0.101253	0.201246	0.205191	0.466013	0.596805	0.466464	0.603039	0.0909489	0.0695322	0.0374759	0.080521	0.360335	0.990415	0.284486	0.0703319	0.0371714	0.0753594	0.680902	0.27851	0.000762621	0.302573	0.702475	0.999278
pentoxifylline	0.968827	0.859876	0.929356	0.559984	0.945008	0.412559	0.823805	0.850571	0.948975	0.788969	0.387615	0.994793	0.977229	0.535643	0.993848	0.999992	0.992711	0.997507	0.982328	0.912733	0.999118	1	0.984618	0.990232	0.59528	0.999755	0.990779	0.989503	0.999571	0.585541	0.114526	0.0531923	0.887845	0.996501	1	0.996746	0.998793	0.69547	0.75656	0.997982	0.999007	0.958287	0.686833	0.259625	0.18051	0.0292737	0.951289	0.0272704	0.998102
theobromine	0.887293	0.705626	0.730714	0.0282232	0.387759	0.0987953	0.0075131	0.0154415	0.00804198	0.000856317	0.000432778	0.096253	0.00317902	0.000755095	0.844117	0.97498	0.92581	0.0214706	0.00763878	0.999719	0.997069	0.999966	0.640211	0.987172	0.0167477	0.993887	0.931417	0.990189	0.994278	0.649246	0.0163372	0.00325164	0.593939	0.999705	0.998079	0.912299	0.627275	0.0285017	0.999569	0.999777	0.995359	0.991758	1	0.684144	0.335294	0.99884	0.106617	0.999491	0.288218
propentofylline	0.954935	0.845011	0.915911	0.253284	0.935041	0.03491	0.392287	0.131941	0.133707	0.102302	0.0477001	0.161487	0.286376	0.0489175	0.0290982	0.500895	0.206893	0.745476	0.191619	0.312783	0.976596	0.991395	0.798339	0.364153	0.079881	0.446527	0.924612	0.663365	0.832652	0.13504	0.00467687	0.000407337	0.0987551	0.878311	0.964093	0.800272	0.82986	0.170635	0.186006	0.440796	0.874802	0.999997	0.991884	0.527415	0.517722	0.676733	0.998704	0.262409	0.992816
COS7	PC aa C20:0	PC aa C24:0	PC aa C26:0	PC aa C28:0	PC aa C28:1	PC aa C30:0	PC aa C30:2	PC aa C32:0	PC aa C32:1	PC aa C32:2	PC aa C32:3	PC aa C34:1	PC aa C34:2	PC aa C34:3	PC aa C34:4	PC aa C36:0	PC aa C36:1	PC aa C36:2	PC aa C36:3	PC aa C36:4	PC aa C36:5	PC aa C36:6	PC aa C38:0	PC aa C38:1	PC aa C38:3	PC aa C38:4	PC aa C38:5	PC aa C38:6	PC aa C40:0	PC aa C40:1	PC aa C40:2	PC aa C40:3	PC aa C40:4	PC aa C40:5	PC aa C40:6	PC aa C42:0	PC aa C42:1	PC aa C42:2	PC aa C42:4	PC aa C42:5	PC aa C42:6	PC aa C44:0	PC aa C48:0	PC ae C30:0	PC ae C30:1	PC ae C30:2	PC ae C32:1	PC ae C32:2	PC ae C34:0
Mean
Kontrolle	100	100	100	100	100	100	100	100	100	100	100	100	100	100	100	100	100	100	100	100	100	100	100	100	100	100	100	100	100	100	100	100	100	100	100	100	100	100	100	100	100	100	100	100	100	100	100	100	100
Coffeine	100.189	61.8374	61.374	103.086	82.3125	104.674	111.718	104.051	113.409	116.522	122.138	108.001	112.315	124.139	109.825	106.529	109.299	110.532	125.65	115.915	72.2872	93.3265	94.424	102.417	120.282	112.825	83.6027	84.7771	81.8062	99.7571	103.188	121.98	108.011	84.6873	74.2157	87.4656	99.8571	98.7419	95.9169	76.9649	65.5287	88.245	71.5224	85.4729	90.0893	91.0123	92.7533	110.363	96.4893
Theophylline	121.263	129.984	123.663	116.072	120.608	107.388	101.205	101.039	115.009	130.691	142.364	111.267	123.425	140.604	125.184	107.847	109.188	121.494	139.004	141.152	108.337	121.98	110.069	104.229	112.348	136.577	119.492	120.413	92.8433	95.8884	91.9508	106.227	125.356	117.844	116.978	94.3921	104.658	87.5385	101.717	110.718	95.7918	96.3503	89.5901	100.534	114.336	111.228	122.784	135.516	126.889
Pentoxifylline	114.649	106.145	110.864	131.963	99.2233	128.111	114.921	126.353	111.471	101.879	105.858	110.787	99.4695	107.817	114.952	109.114	107.187	101.415	113.108	123.06	95.7976	121.422	105.45	102.707	108.213	121.69	108.251	102.694	78.0265	109.129	95.8572	99.2879	115.938	110.981	92.0038	94.4734	134.842	110.148	87.9445	98.2593	82.5061	94.4388	70.5519	159.073	111.255	100.042	110.122	105.954	161.724
Theobromine	111.418	137.71	139.689	109.022	99.5131	113.176	86.5197	118.567	76.536	46.3347	57.351	92.8799	58.5322	54.3284	100.514	115.266	102.258	77.7609	69.5683	84.555	132.342	132.649	102.737	95.3152	74.5905	87.823	108.344	86.9566	90.3176	96.0242	71.4867	76.5102	91.4612	113.068	97.647	102.844	113.405	84.8792	102.772	111.963	99.5351	111.85	91.1332	170.36	120.615	106.197	106.254	83.5256	197.628
Propentofylline	90.7322	82.8342	87.8551	94.7357	90.7116	84.3873	101.638	96.6841	94.1496	85.362	86.5109	104.783	88.4749	98.5854	99.27	98.8148	97.2207	94.2623	106.427	121.003	67.896	101.686	95.0728	85.2989	96.852	125.361	95.7463	95.5819	63.3508	101.757	82.2504	75.2998	105.371	104.312	84.8274	91.7003	145.624	106.462	81.8354	75.2484	64.0229	87.2647	84.5292	103.227	115.557	112.977	129.083	147.094	152.95
SEM
Kontrolle	3.27305	19.2691	17.8172	4.73546	10.5965	8.10295	8.70708	8.55817	9.09924	9.94327	9.89234	9.45394	9.65801	10.2389	8.1258	10.3565	10.1326	9.74349	10.6577	9.57713	13.9341	8.62837	10.0153	9.8852	10.0495	10.2244	13.2986	12.6548	11.2689	10.591	10.0732	8.83872	9.13719	11.6711	16.8781	9.30068	10.2467	10.2998	10.2029	9.7151	15.9462	7.92205	7.74656	4.36262	5.38015	5.97044	6.71375	7.28879	6.72489
Coffeine	9.41958	10.7197	11.3057	8.03569	7.75456	8.84334	8.11663	9.41389	9.10989	8.86319	8.47856	9.82702	9.20451	9.05672	8.66522	10.999	10.1686	9.52179	9.26823	9.5698	10.111	8.95734	10.3214	10.1324	9.14183	10.1242	10.8352	11.7811	10.8282	11.9494	10.5866	8.85511	10.6445	11.8154	13.2613	11.483	15.0666	13.5811	12.3927	12.5268	12.8516	13.8705	15.6268	10.5308	10.032	10.7015	10.7131	10.2057	10.9811
Theophylline	7.04233	26.1006	24.5843	4.96351	15.9995	9.31003	10.5113	9.23195	9.80891	10.0221	9.31091	10.2253	9.96103	10.9326	9.996	10.1602	10.2013	9.90024	10.5105	9.81498	17.7079	7.85331	9.15038	9.92903	10.84	9.41459	12.9405	13.8117	8.88559	10.4416	9.60975	9.7535	9.02422	11.4858	20.9076	10.8518	10.9289	10.7664	7.13888	12.3694	21.6555	8.15064	11.9405	6.45359	9.74028	9.94512	6.98443	7.86031	6.83016
Pentoxifylline	18.5032	33.8095	33.4454	24.4373	23.7572	27.3477	31.9533	26.297	29.1957	34.4979	31.9767	27.981	32.317	34.1445	25.1625	26.3497	27.386	29.884	33.3406	29.8062	25.8526	22.722	26.9213	27.2643	30.8092	28.7908	23.757	24.5556	28.5965	26.9264	28.7466	32.0693	26.691	22.0028	26.4311	26.038	29.3084	28.628	25.1503	24.4115	28.1526	26.7826	26.3716	43.9384	17.2685	12.3294	12.8728	9.93985	33.0762
Theobromine	13.4501	34.8192	30.227	11.3713	22.5937	13.7429	12.8185	13.5405	11.5595	18.9641	17.3402	13.8322	14.6532	17.9611	9.23703	17.1077	14.0036	11.6185	13.8181	12.0186	15.1203	19.1431	14.2587	11.1903	15.8914	12.1862	19.9136	13.364	12.1759	9.1974	15.0251	17.9565	11.2079	17.4981	24.1116	9.3023	14.9102	8.60602	11.3566	23.3934	31.2282	9.55979	10.1698	9.78604	7.62703	11.9721	7.97477	12.6449	22.9245
Propentofylline	5.28405	16.6525	16.4468	7.81452	10.676	7.71796	5.71189	6.63966	8.40753	11.3908	10.1148	5.79887	9.84626	9.8793	7.21435	4.73305	5.83291	8.02042	7.91919	3.36269	5.91969	2.89353	5.43662	6.33374	5.45724	3.75507	4.23244	3.30277	4.3675	5.85071	7.15701	5.76363	4.06365	3.28577	5.45349	5.5144	9.22063	7.08165	3.39355	4.22655	6.4279	5.93465	7.2611	4.9067	3.05934	6.46235	4.9222	3.69717	5.81904
dunnets P ctrl vs
caffeine	1	0.810497	0.765226	0.999954	0.905527	0.999806	0.986561	0.999886	0.966748	0.944749	0.832103	0.996311	0.977079	0.831493	0.987248	0.998664	0.991965	0.985875	0.803998	0.957472	0.648982	0.998437	0.999104	0.999983	0.866922	0.980047	0.928221	0.927477	0.754185	1	0.999927	0.802035	0.996014	0.927532	0.795059	0.942739	1	1	0.999527	0.763922	0.571762	0.958195	0.295373	0.997114	0.952062	0.951809	0.975004	0.902232	0.999996
theophylline	0.598351	0.915041	0.956277	0.915786	0.842139	0.998238	1	1	0.947994	0.620426	0.304085	0.982942	0.768856	0.419926	0.648132	0.99683	0.992395	0.795755	0.468052	0.378689	0.996066	0.797703	0.98635	0.999729	0.980075	0.458779	0.868227	0.805543	0.992901	0.999807	0.993886	0.998915	0.6864	0.875637	0.951763	0.998297	0.999916	0.974457	0.999993	0.985987	0.999921	0.999801	0.950846	1	0.824022	0.890551	0.320038	0.0514889	0.943409
pentoxifylline	0.854653	0.999935	0.998612	0.455238	1	0.678781	0.962908	0.702814	0.982696	0.999998	0.999396	0.98586	1	0.998406	0.929347	0.993692	0.997537	0.999999	0.984055	0.839097	0.999852	0.812676	0.999197	0.99997	0.996778	0.853534	0.996093	0.999975	0.606393	0.991588	0.999737	1	0.926773	0.980854	0.998238	0.99841	0.640695	0.989436	0.94038	0.999998	0.94556	0.998485	0.267003	0.530297	0.922397	1	0.908327	0.989524	0.420815
theobromine	0.9498	0.842472	0.778557	0.993667	1	0.980527	0.979989	0.913646	0.794693	0.176002	0.340042	0.998287	0.319689	0.355251	1	0.953539	0.999993	0.803785	0.722648	0.968901	0.555752	0.52412	0.999978	0.999646	0.770101	0.987004	0.996697	0.966998	0.978356	0.99987	0.550736	0.79079	0.995703	0.967558	0.999997	0.99995	0.989887	0.953868	0.999944	0.981654	1	0.964336	0.978925	0.41164	0.595158	0.991804	0.989187	0.661028	0.106487
propentofylline	0.978498	0.993002	0.998122	0.999498	0.994592	0.960733	0.999999	0.999966	0.999375	0.971831	0.977796	0.999747	0.98592	1	1	1	0.999981	0.999316	0.999529	0.899461	0.562501	0.999999	0.999607	0.940154	0.999975	0.794992	0.99987	0.999771	0.197907	0.999998	0.876073	0.758477	0.999521	0.999803	0.974732	0.991651	0.439745	0.998948	0.795494	0.747529	0.57614	0.952485	0.831484	0.999999	0.804803	0.848732	0.166808	0.00973386	0.605513
[truncated: 629 more columns]
